# Supplementary material for: Dithiocarbamate-mediated thioamidation of arylglyoxylic acids by decarboxylative–decarbonylative C–C bond formation reactions
Source: Royal Society of Chemistry journal article supplement (doi:10.1039/d3qo00032j), 2023-01-01
Supplement: d3qo00032j1.pdf [file d3qo00032j1.pdf]

# Supporting information

## Dithiocarbamate mediated thioamidation of arylglyoxylic acids by decarboxylative-decarbonylative C-C bond formation reactions

Debabrata Patra and Amit Saha\*

| <b>Table of contents</b>                                                               | <b>Page no.</b> |
|----------------------------------------------------------------------------------------|-----------------|
| A. General information.....                                                            | S2              |
| B. Representative experimental procedure of $\alpha$ -oxocarboxylic acid.....          | S2              |
| C. Experimental procedure of L- proline ethyl ester.....                               | S3              |
| D. General experimental procedure.....                                                 | S3              |
| E. Characterization data of all synthesized products.....                              | S4-S9           |
| F. $^1\text{H}$ , $^{13}\text{C}$ and $^{19}\text{F}$ NMR spectra of all products..... | S10-S38         |
| G. References.....                                                                     | S39-S40         |

## A. General information:

**General Information.** All the commercial starting materials and reagents were used without further purification. Silica gel (silica gel, f24), TLC plates were purchased from Merck. In column chromatographic purification process, silica gel 60-120 mesh has been used. IR spectra were recorded in JASCO FT/IR-4600 in neat condition.  $^1\text{H}$  NMR spectra were recorded using Bruker Spectrometer at 300 MHz, 400 MHz. The  $^{19}\text{F}$  spectra of synthesized fluorinated product was recorded in  $\text{CDCl}_3$  on Bruker Spectrometer, 400 MHz.  $^{13}\text{C}$  NMR spectra were recorded at 75 MHz, 100 MHz. In all NMR,  $\text{CDCl}_3$  and TMS have been used as solvent and internal standard respectively. The chemical shifts are reported in ppm scale considering standard signal of TMS at 0.00 ppm. The coupling constants (J values) are measured in Hz and splitting patterns of the proton are described as s (singlet), d (doublet), t (triplet), and m (multiplet). In NMR data, the rotamers are mentioned as #1 and #2. Melting points were determined by a LabX India digital melting point apparatus.

## B. Representative experimental procedure of $\alpha$ - oxocarboxylic acids:<sup>[1]</sup>

### Example for synthesis of 4-methylphenylglyoxalic acid

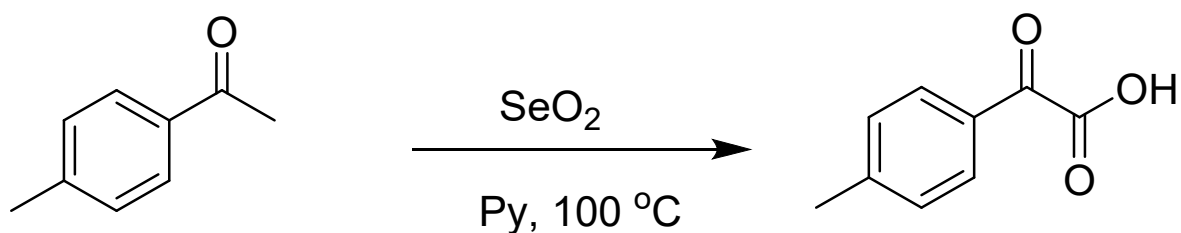

A mixture of 4-methylacetophenone (10 mmol, 1 eq),  $\text{SeO}_2$  (15 mmol, 1.5 eq) and anhydrous Py (4 mL) 500 mL round bottom flask equipped with a magnetic bar. The reaction mixture was heated in an oil bath under Ar at  $110\text{ }^\circ\text{C}$  for 4 h. Upon completion (TLC) the reaction mixture was cooled to room temperature and filtered. The residue was washed with EtOAc (50 mL). The combined filtrate was treated with 1N HCL. The organic layer was separated and the aq. layer was extracted with EtOAc then the organic layer as was treated with 1M NaOH and aq. layer was separated. The organic layer was extracted water and the combined aq. layers were added dropwise with 1M HCL until pH = 1-2. The mixture was extracted with EtOAc and the combined organic layer were dried with anhydrous  $\text{Na}_2\text{SO}_4$  and concentrated in vacuum. The desired product was recrystallized from ethanol. Yield: 74% (555 mg).

**This procedure was followed for preparation of other phenylglyoxalic acid derivatives listed in Table 2.**

### C. Experimental procedure of L- proline ethyl ester<sup>[2]</sup>

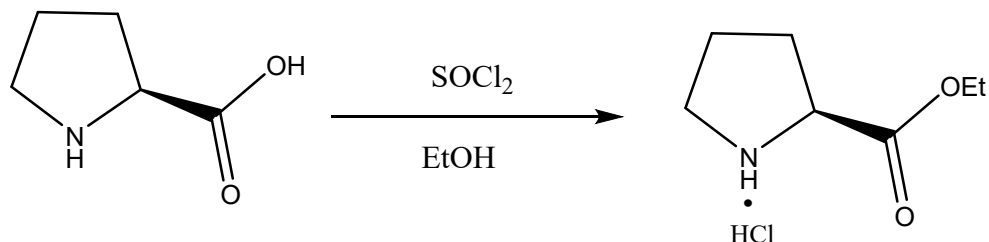

To a solution of L-proline (10 mmol, 1 eq), in EtOH (10 ml),  $\text{SOCl}_2$  (13 mmol, 1.3 eq), was added dropwise at 5 °C and the mixture was stirred for 12 h at room temperature. After completion of the reaction ethanol was removed under reduced pressure. The crude product (L-proline ethyl ester hydrochloride) was obtained as pale yellow viscous oil which was directly used in the reaction without further purification. Yield 78%.

### D. General experimental procedure:

**General Experimental Procedure for the Preparation of Thioamides (3).**  $\text{CS}_2$  (0.1 mL, 1.5 mmol) was added drop wise to a solution of secondary amine (1 mmol) and  $\text{Et}_3\text{N}$  (0.28 mL, 2 mmol) in NMP (2 ml) at 5 °C. The resulting solution was stirred at room temperature for 5 min. Arylglyoxylic acid (**2**) (0.8 mmol),  $(\text{dppf})\text{PdCl}_2$  (10 mol %), and  $(\text{NH}_4)_2\text{S}_2\text{O}_8$  (1 mmol, 228 mg), were added to the solution of dithiocarbamate anion (**1**) containing  $\text{Et}_3\text{N}$ . The reaction mixture was allowed to stir at 70 °C for a certain time period under Ar atmosphere. The progress of the reaction was monitored by TLC. After completion of the reaction, the crude product was obtained by usual work-up using EtOAc. The crude product was purified by column chromatography over silica gel using petroleum ether-ethyl acetate solvent mixture.

## E. Characterization data of all synthesized products:

**Phenyl(piperidin-1-yl)methanethione<sup>[3]</sup> (3a, Table 2):** Yellow solid; Yield: 96% (157 mg); <sup>1</sup>H NMR (300 MHz, CDCl<sub>3</sub>): δ 7.34-7.24 (5H, m), 4.37-4.33 (2H, m), 3.52-3.48 (2H, m), 1.83-1.70 (4H, m), 1.59-1.51 (2H, m). <sup>13</sup>C NMR (75 MHz, CDCl<sub>3</sub>): δ 199.54, 143.41, 128.42, 128.37, 125.43, 53.20, 50.63, 26.91, 25.52, 24.71.

**Phenyl(pyrrolidin-1-yl)methanethione<sup>[3]</sup> (3b, Table 2):** Yellow liquid; Yield: 90% (137 mg); <sup>1</sup>H NMR (300 MHz, CDCl<sub>3</sub>): δ 7.37-7.32 (5H, m), 3.98 (2H, t, J=6Hz), 3.47 (2H, t, J=6 Hz), 2.11-2.04 (2H, m), 2.01-1.95 (2H, m). <sup>13</sup>C NMR (75 MHz, CDCl<sub>3</sub>): δ 197.33, 144.01, 128.75, 128.34, 125.67, 53.82, 53.44, 26.51, 24.70.

**Morpholino(phenyl)methanethione<sup>[3]</sup> (3c, Table 2):** Yellow solid; m.p. 135-137 °C. Yield: 93% (154 mg); <sup>1</sup>H NMR (400 MHz, CDCl<sub>3</sub>): δ 7.35-7.31 (3H, m), 7.28-7.24 (2H, m), 4.44-4.40 (2H, m), 3.88-3.85 (2H, m), 3.62-3.57 (4H, m). <sup>13</sup>C NMR (100 MHz, CDCl<sub>3</sub>): δ 200.99, 142.48, 128.89, 128.56, 125.90, 66.75, 66.53, 52.53, 49.56. IR (neat) 2920, 2847, 1720, 1619, 1478, 1433, 1288, cm<sup>-1</sup>.

**N,N-dimethylbenzothioamide<sup>[4]</sup> (3d, Table 2):** Yellow solid; Yield: 92% (121 mg); <sup>1</sup>H NMR (400 MHz, CDCl<sub>3</sub>): δ 7.37-7.27 (5H, m), 3.59 (3H, s), 3.15 (3H, s). <sup>13</sup>C NMR (100 MHz, CDCl<sub>3</sub>): δ 201.28, 143.40, 128.59, 128.35, 125.75, 44.19, 43.26.

**Piperidin-1-yl(p-tolyl)methanethione<sup>[5]</sup> (3e, Table 2):** Pale yellow solid; Yield: 92% (161 mg); <sup>1</sup>H NMR (400 MHz, CDCl<sub>3</sub>): δ 7.17-7.11 (4H, m), 4.34-4.32 (2H, m), 3.54-3.51 (2H, m), 2.33 (3H, s), 1.80-1.73 (4H, m), 1.72-1.53 (2H, m). <sup>13</sup>C NMR (100 MHz, CDCl<sub>3</sub>): δ 199.99, 140.65, 138.44, 128.97, 125.58, 53.21, 50.75, 26.91, 25.52, 24.20, 21.25.

**Pyrrolidin-1-yl(*p*-tolyl)methanethione**<sup>[5]</sup> (**3f**, Table 2): White solid; Yield: 89% (145 mg); <sup>1</sup>H NMR (400 MHz, CDCl<sub>3</sub>): δ 7.24 (2H, d, J=12 Hz), 7.12 (2H, d, J=8 Hz), 3.93 (2H, t, J=8 Hz), 3.46 (2H, t, J=8 Hz), 2.32 (3H, s), 2.07-2.00 (2H, m), 1.97-1.89 (2H, m). <sup>13</sup>C NMR (100 MHz, CDCl<sub>3</sub>): δ 197.42, 141.23, 138.79, 128.83, 125.78, 53.87, 53.52, 26.50, 24.69, 21.29.

**Morpholino(*p*-tolyl)methanethione**<sup>[3]</sup> (**3g**, Table 2): Yellow solid; m.p. 126--129 °C. Yield: 90% (159 mg); <sup>1</sup>H NMR (400 MHz, CDCl<sub>3</sub>): δ 7.18-7.12 (4H, m), 4.41-4.38 (2H, m), 3.85-3.83 (2H, m), 3.60 (4H, m), 2.32 (3H, s). <sup>13</sup>C NMR (100 MHz, CDCl<sub>3</sub>): δ 201.30, 139.69, 139.07, 129.11, 126.07, 66.76, 66.53, 52.60, 49.70, 21.32. IR (neat) 2980, 2921, 2855, 1474, 1431, 1292, 1256 cm<sup>-1</sup>.

**N,N,4-trimethylbenzothioamide**<sup>[4]</sup> (**3h**, Table 2): Pale yellow solid; Yield: 88% (126 mg); <sup>1</sup>H NMR (400 MHz, CDCl<sub>3</sub>): δ 7.22-7.13 (4H, m), 3.59 (3H,s), 3.18 (3H,s), 2.34 (3H, s). <sup>13</sup>C NMR (100 MHz, CDCl<sub>3</sub>): δ 201.66, 140.60, 138.71, 128.90, 125.91, 44.20, 43.35, 21.26.

**(4-chlorophenyl)(piperidin-1-yl)methanethione**<sup>[6]</sup> (**3i**, Table 2): Yellow liquid; Yield: 91% (175 mg); <sup>1</sup>H NMR (400 MHz, CDCl<sub>3</sub>): δ 7.31-7.28 (2H, m), 7.21-7.19 (2H, m), 4.32-4.30 (2H, m), 3.51-3.48 (2H, m), 1.81-1.71 (4H, m), 1.70-1.52 (2H, m). <sup>13</sup>C NMR (100 MHz, CDCl<sub>3</sub>): δ 198.10, 141.71, 134.32, 128.63, 126.99, 53.27, 50.70, 26.90, 25.47, 24.10.

**(4-chlorophenyl)(pyrrolidin-1-yl)methanethione**<sup>[6]</sup> (**3j**, Table 2): Yellow solid; Yield: 86% (156 mg); <sup>1</sup>H NMR (400 MHz, CDCl<sub>3</sub>): δ 7.33-7.28 (4H, m), 3.95-3.92 (2H, m), 3.47-3.43(2H, m), 2.11-2.04 (2H, m), 2.03-1.93 (2H, m). <sup>13</sup>C NMR (100 MHz, CDCl<sub>3</sub>): δ 195.85, 142.26, 134.71, 128.52, 127.22, 53.85, 53.55, 26.53, 24.64.

**4-chloro-N,N-dimethylbenzothioamide**<sup>[4]</sup> (**3k**, Table 2): Pale yellow solid; Yield: 84% (134 mg); <sup>1</sup>H NMR (300 MHz, CDCl<sub>3</sub>): δ 7.32-7.29 (2H, m), 7.24-7.21 (2H, m), 3.56 (3H, s), 3.14 (3H, s). <sup>13</sup>C NMR (75 MHz, CDCl<sub>3</sub>): δ 199.78, 141.68, 134.54, 128.57, 127.31, 44.21, 43.33.

**(4-bromophenyl)(piperidin-1-yl)methanethione<sup>[6]</sup> (3l, Table 2):** White solid; m.p. 118--121 °C. Yield: 86% (195 mg); <sup>1</sup>H NMR (300 MHz, CDCl<sub>3</sub>): δ 7.47 (2H, d, J= 9 Hz), 7.15 (2H, d, J= 6 Hz), 4.33 (2H, t, J=6 Hz), 3.51 (2H, t, J=6 Hz), 1.81-1.75 (4H, m), 1.61-1.56 (2H, m). <sup>13</sup>C NMR (75 MHz, CDCl<sub>3</sub>): δ 198.16, 142.16, 131.61, 127.20, 122.50, 53.26, 50.68, 26.90, 25.46, 24.12. IR (neat) 2919, 2855, 1477, 1435, 1237 cm<sup>-1</sup>.

**(4-bromophenyl)(pyrrolidin-1-yl)methanethione<sup>[6]</sup> (3m, Table 2):** Light brown solid; Yield: 82% (177 mg); <sup>1</sup>H NMR (300 MHz, CDCl<sub>3</sub>): δ 7.48 (2H, d, J= 9 Hz), 7.24 (2H, d, J=9 Hz), 3.95 (2H, t, J= 6 Hz), 3.46 (2H, t, J= 6 Hz), 2.11-2.04 (2H, m), 2.02-1.96 (2H, m). <sup>13</sup>C NMR (75 MHz, CDCl<sub>3</sub>): δ 195.90, 142.71, 131.56, 131.50, 127.43, 122.94, 53.83, 53.52, 26.53, 24.64.

**4-bromo-N,N-dimethylbenzothioamide<sup>[6]</sup> (3n, Table 2):** Yellow liquid; Yield: 80% (156 mg); <sup>1</sup>H NMR (400 MHz, CDCl<sub>3</sub>): δ 7.50-7.47 (2H, m), 7.20-7.18 (2H, m), 3.59, (3H, s), 3.17 (3H, s). <sup>13</sup>C NMR (100 MHz, CDCl<sub>3</sub>): δ 199.95, 142.15, 131.54, 127.52, 122.76, 44.15, 43.29.

**(4-methoxyphenyl)(piperidin-1-yl)methanethione<sup>[3]</sup> (3o, Table 2):** White solid; Yield: 66% (124 mg); <sup>1</sup>H NMR (300 MHz, CDCl<sub>3</sub>): δ 7.27-7.24 (2H, m), 6.86-6.84 (2H, m), 4.33 (2H, t, J=6 Hz), 3.81 (3H, s), 3.57 (2H, t, J=6 Hz), 1.81-1.74 (4H, m), 1.60-1.55 (2H, m). <sup>13</sup>C NMR (75 MHz, CDCl<sub>3</sub>): δ 199.87, 159.92, 135.95, 127.58, 113.63, 55.40, 53.36, 51.09, 26.95, 25.51, 24.23.

**(4-methoxyphenyl)(pyrrolidin-1-yl)methanethione<sup>[5]</sup> (3p, Table 2):** White solid; m.p. 112-114 °C. Yield: 62% (109 mg); <sup>1</sup>H NMR (400 MHz, CDCl<sub>3</sub>): δ 7.35 (2H, d, J= 8 Hz), 6.84 (2H, d, J= 8 Hz), 3.95 (2H, t, J= 8 Hz), 3.80 (3H, s), 3.52 (2H, t, J= 4Hz), 2.08-2.04 (2H, m), 1.96-1.93 (2H, m). <sup>13</sup>C NMR (100 MHz, CDCl<sub>3</sub>): δ 197.14, 160.10, 136.52, 127.76, 113.44, 55.40, 54.02, 53.75, 26.57, 24.72. IR (neat) 2957, 2869, 2822, 1606, 1441, 1236 cm<sup>-1</sup>.

**(3-nitrophenyl)(piperidin-1-yl)methanethione<sup>[6]</sup> (3q, Table 2):** Yellow solid; Yield: 72% (144 mg); <sup>1</sup>H NMR (400 MHz, CDCl<sub>3</sub>): δ 8.09-8.03 (2H, m), 7.54-7.45 (2H, m), 4.28-4.25 (2H, m), 3.47-3.43 (2H, m), 1.78-1.69 (4H, m), 1.54-1.50 (2H, m). <sup>13</sup>C NMR (100 MHz, CDCl<sub>3</sub>): δ 195.57, 147.92, 144.50, 131.35, 129.72, 122.99, 120.60, 53.46, 50.65, 26.88, 25.42, 23.93.

**(3-nitrophenyl)(pyrrolidin-1-yl)methanethione<sup>[6]</sup> (3r, Table 2):** Yellow solid; Yield: 68% (128 mg); <sup>1</sup>H NMR (400 MHz, CDCl<sub>3</sub>): δ 8.11-8.06 (2H, m), 7.61(1H, d, J=8 Hz), 7.49-7.45 (1H, m), 3.86 (2H, t, J=8 Hz), 3.40 (2H, t, J=8Hz), 2.06-1.99 (2H, m), 1.96-1.89 (2H, m). <sup>13</sup>C NMR (100 MHz, CDCl<sub>3</sub>): δ 193.37, 147.76, 144.99, 131.70, 129.64, 123.30, 120.82, 53.97, 53.86, 26.56, 24.56.

**N,N-dimethyl-3-nitrobenzothioamide<sup>[4]</sup> (3s, Table 2):** Yellow solid; Yield: 65% (109 mg); <sup>1</sup>H NMR (400 MHz, CDCl<sub>3</sub>): δ 8.19-8.15 (2H, m), 7.65-7.63 (1H, m), 7.56-7.52 (1H, m), 3.61 (3H, s), 3.19 (3H, s). <sup>13</sup>C NMR (100 MHz, CDCl<sub>3</sub>): δ 197.62, 147.92, 144.53, 131.74, 129.65, 123.26, 120.85, 44.26, 43.31.

**N-benzyl-4-methylbenzothioamide<sup>[7]</sup> (3t, Table 2):** Yellow solid; m.p. 83-85°C. Yield: 85% (164 mg); <sup>1</sup>H NMR (400 MHz, CDCl<sub>3</sub>): δ 7.68 (2H, d, J= 8 Hz), 7.41-7.38 (5H, m), 7.18 (2H, d, J= 8 Hz), 5.00 (2H, d, J= 8 Hz), 2.37 (3H, s). <sup>13</sup>C NMR (100 MHz, CDCl<sub>3</sub>): δ 198.94, 141.81, 138.82, 136.34, 129.18, 129.06, 128.41, 128.24, 126.71, 51.09, 21.35. IR (neat) 3313, 3033, 1607, 1518, 1318, 1268 cm<sup>-1</sup>.

**N-phenylbenzothioamide<sup>[8]</sup> (3u, Table 2):** Yellow solid; Yield: 58% (99 mg); <sup>1</sup>H NMR (400 MHz, CDCl<sub>3</sub>): δ 9.09 (1H, br. S), 7.84-7.73 (4H, m), 7.50-7.42 (5H, m), 7.41-7.29 (1H, m), <sup>13</sup>C NMR (100 MHz, CDCl<sub>3</sub>): δ 198.59, 143.15, 139.05, 131.32, 129.08, 128.66, 127.03, 126.77, 123.81.

**ethyl (phenylcarbonothioyl)-L-prolinate<sup>[9]</sup> (3v, Table 2):** Pale yellow solid; Yield: 60% (126 mg); <sup>1</sup>H NMR (400 MHz, CDCl<sub>3</sub>): δ 7.39-7.29 (5H, m, #1), 7.23-7.22 (1.12H, m, #2), 7.22-7.21 (0.67, m, #2), 5.12-5.09 (1H, m, #1), 4.28-4.23 (0.29H, m, #2), 4.10 (2H, q, J=8 Hz, #1), 4.03-4.00 (0.52H, q, J=7.4 Hz,

#2), 3.67-3.62 (0.67H, m, #2), 3.57-3.54 (1H, m, #1), 3.53-3.51 (1H, m, #1), 2.46-2.43 (1H, m, #1), 2.42-2.40 (0.22H, m, #2), 2.16-2.10 (2.92H, m, #1, #2), 2.09-1.92 (1H, m, #1), 1.32 (3H, t, J=8Hz, #1), 1.14 (0.89H, t, J=7.2 Hz, #2). <sup>13</sup>C NMR (100 MHz, CDCl<sub>3</sub>): δ 199.79 (C=S, #2), 199.47 (C=S, #1), 170.65 (CO<sub>2</sub>Et, #2), 170.4 (CO<sub>2</sub>Et, #1), 143.85 (C, #2), 143.58 (C, #1), 128.96 (CH, #1), 128.63 (CH, #2), 128.35 (CH, #2), 128.32 (CH, #1), 125.67 (CH, #1), 125.40 (CH, #2), 64.87 (2-CH, #1), 64.67 (2-CH, #2), 61.65 (OCH<sub>2</sub>CH<sub>3</sub>, #2), 61.45 (OCH<sub>2</sub>CH<sub>3</sub>, #1), 54.10 (5-CH<sub>2</sub>, #1), 53.46 (5-CH<sub>2</sub>, #2), 31.52 (3-CH<sub>2</sub>, #2), 29.73 (3-CH<sub>2</sub>, #1), 25.20 (4-CH<sub>2</sub>, #1), 22.84 (4-CH<sub>2</sub>, #2), 14.21 (OCH<sub>2</sub>CH<sub>3</sub>, #1), 14.03 (OCH<sub>2</sub>CH<sub>3</sub>, #2).

**(4-fluorophenyl)(piperidin-1-yl)methanethione<sup>[10]</sup> (3W, Table 2):** pale yellow liquid; yield: 88% (196 mg); <sup>1</sup>H NMR (400 MHz, CDCl<sub>3</sub>): δ 7.26-7.21 (2H, m), 7.02-6.96 (2H, m), 4.32-4.28 (2H, m), 3.50-3.47 (2H, m), 1.80-1.71 (4H, m), 1.69-1.51 (2H, m). <sup>13</sup>C NMR (100 MHz, CDCl<sub>3</sub>): δ 198.46, 164.16, 160.87, 139.51, 139.47, 127.69, 127.58, 115.51, 115.22, 53.29, 50.85, 26.89, 25.47, 24.09. <sup>19</sup>F NMR (100 MHz, CDCl<sub>3</sub>) -112.67.

**2-phenyl-1-(piperidin-1-yl)ethane-1-thione<sup>[11]</sup> (3x, Table 2):** Pale yellow liquid; Yield: 64% (140 mg); <sup>1</sup>H NMR (400 MHz, CDCl<sub>3</sub>): δ 7.26-7.12 (5H, m), 4.25 (2H, s), 4.19-4.16, (2H, m), 3.49-3.46 (2H, m), 1.59-1.49 (4H, m), 1.22-1.17 (2H, m). <sup>13</sup>C NMR (100 MHz, CDCl<sub>3</sub>): δ 198.35, 136.18, 128.78, 127.87, 126.87, 51.62, 51.59, 51.00, 26.21, 25.25, 23.84.

**1-(piperidin-1-yl)ethane-1-thione<sup>[12]</sup> (3y, Table 2):** white solid; Yield: 32% (45 mg); <sup>1</sup>H NMR (400 MHz, CDCl<sub>3</sub>): δ 4.19-4.17 (2H, m), 3.63-3.61 (2H, m), 2.58 (3H, s), 1.65-1.58 (6H, m). <sup>13</sup>C NMR (100 MHz, CDCl<sub>3</sub>): δ 192.14, 51.18, 51.14, 32.39, 26.47, 25.28, 23.93.

**(4-methoxyphenyl)(pyrrolidin-1-yl)methanone<sup>[13]</sup> (3p')**: Yellow solid; Yield: 80% (164 mg); <sup>1</sup>H NMR (400 MHz, CDCl<sub>3</sub>): δ 7.50-7.48 (2H, m), 6.89-6.85 (2H, m), 3.80 (3H, s), 3.62-3.59 (2H, m), 3.47-3.44



(2H, m), 1.94-1.91 (2H, m), 1.87-1.82 (2H, m). <sup>13</sup>C NMR (100 MHz, CDCl<sub>3</sub>): δ 167.26, 158.57, 127.08, 126.91, 111.17, 53.06, 47.56, 44.10, 24.24, 22.19.

**2,2,6,6-tetramethylpiperidin-1-yl benzoate** <sup>[14]</sup> (**4**): White solid; <sup>1</sup>H NMR (400 MHz, CDCl<sub>3</sub>): δ 8.08-8.06 (2H, m), 7.60-7.56 (1H, m), 7.55-7.44 (2H, m), 1.82-1.48 (6H, m), 1.28 (6H, s), 1.12 (6H, s). <sup>13</sup>C NMR (100 MHz, CDCl<sub>3</sub>): δ 166.44, 132.87, 129.74, 129.59, 128.47, 60.44, 39.08, 32.00, 31.95, 20.89, 20.85, 17.02

## F. $^1\text{H}$ and $^{13}\text{C}$ NMR spectra of all products:

$^1\text{H}$  NMR (300 MHz,  $\text{CDCl}_3$ ) and  $^{13}\text{C}$  NMR (75 MHz,  $\text{CDCl}_3$ ) spectrum of 3a

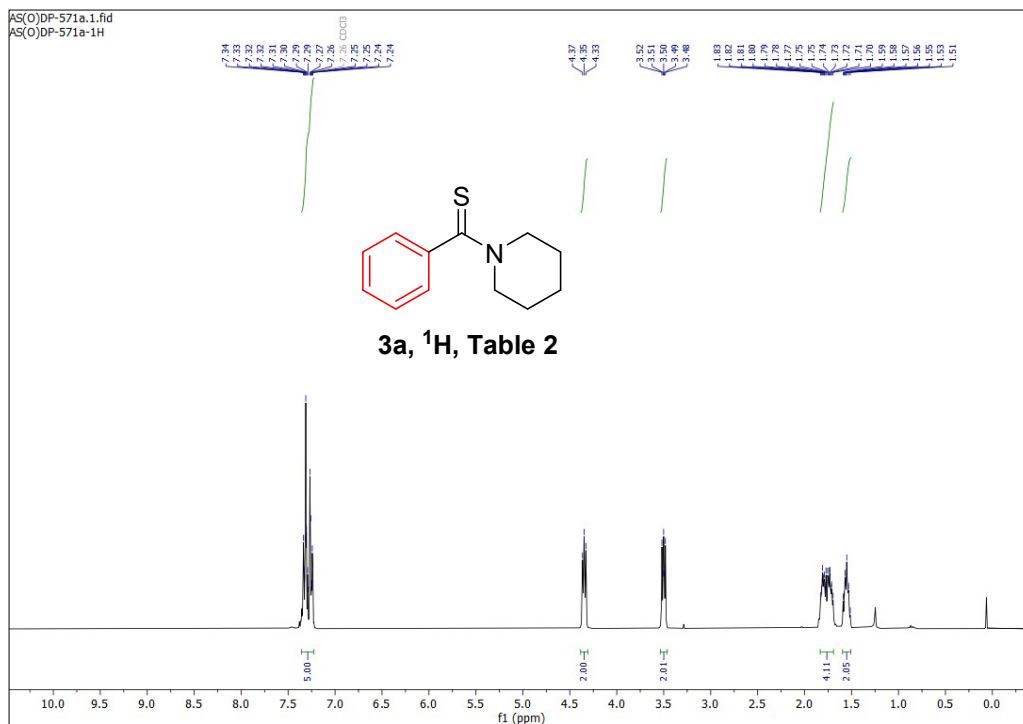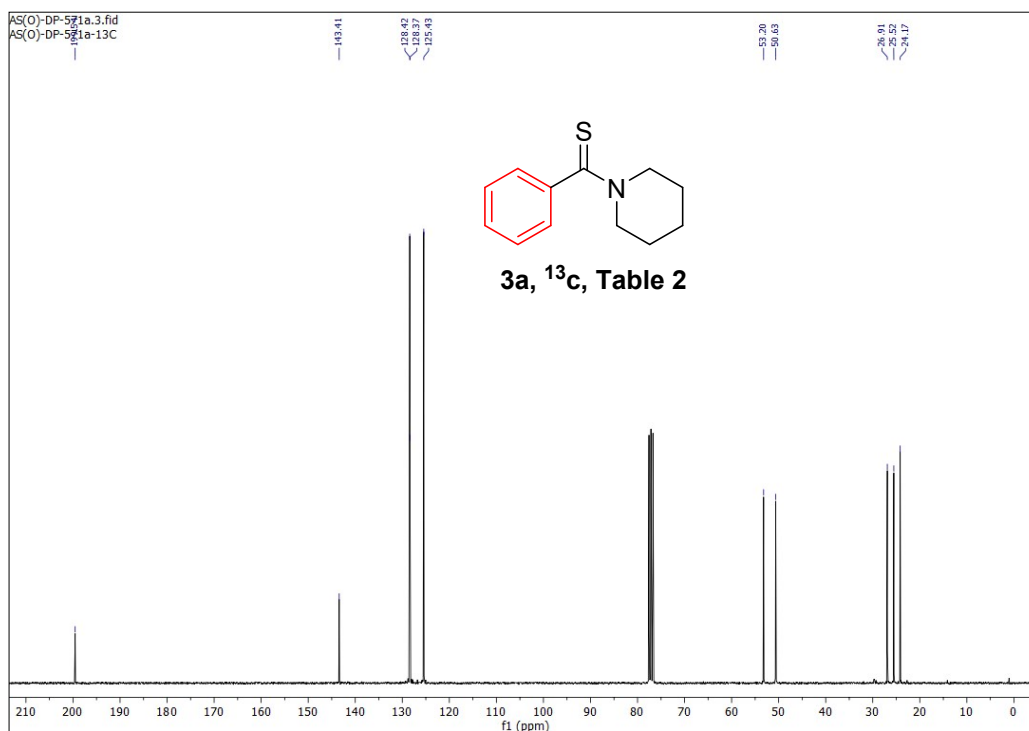

# <sup>1</sup>H NMR (300 MHz, CDCl<sub>3</sub>) and <sup>13</sup>C NMR (75 MHz, CDCl<sub>3</sub>) spectrum of 3b

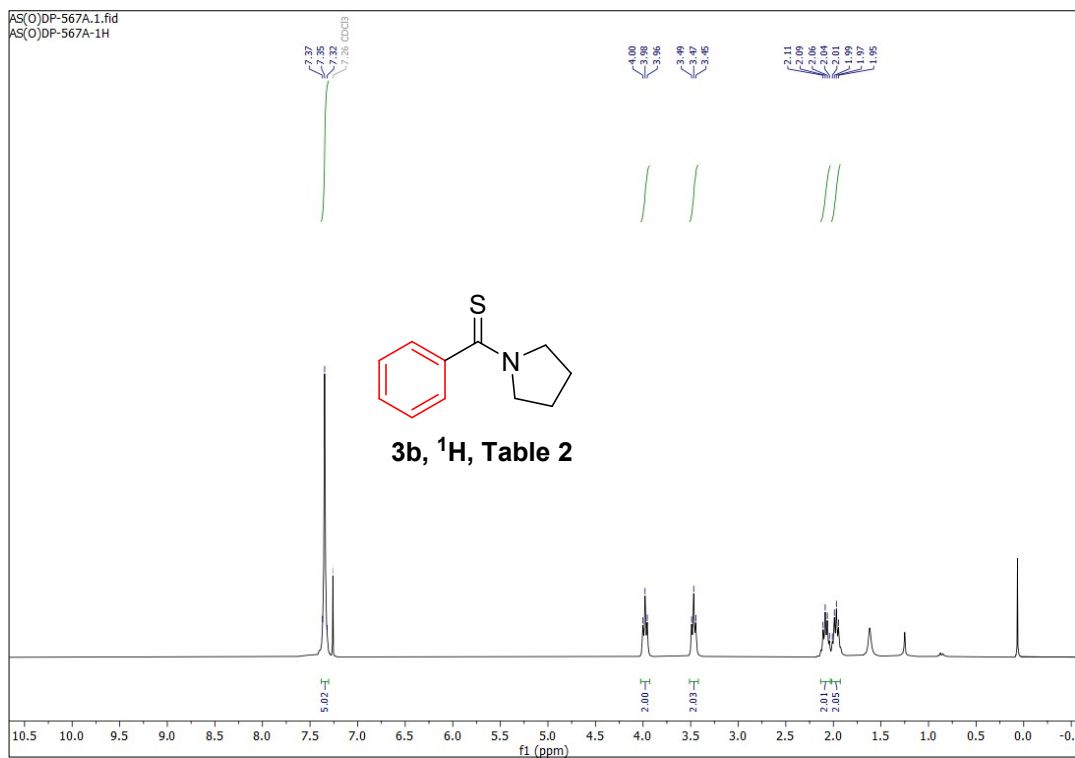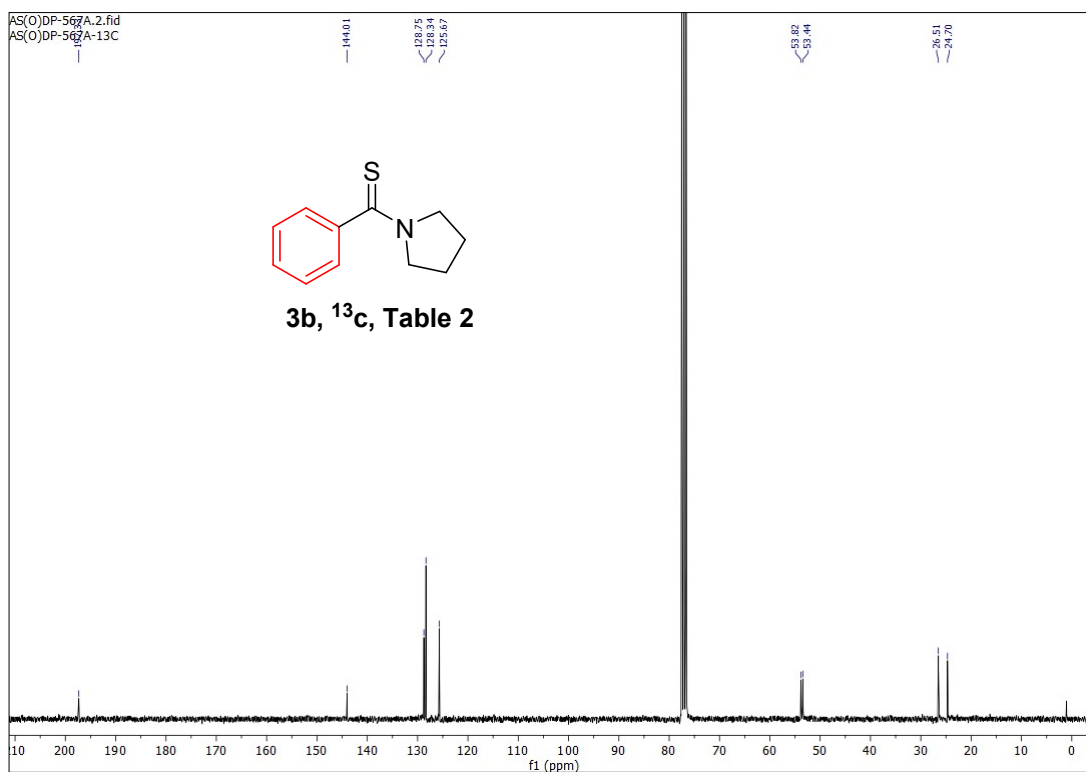

# $^1\text{H}$ NMR (400 MHz, $\text{CDCl}_3$ ) and $^{13}\text{C}$ NMR (100 MHz, $\text{CDCl}_3$ ) spectrum of **3c**

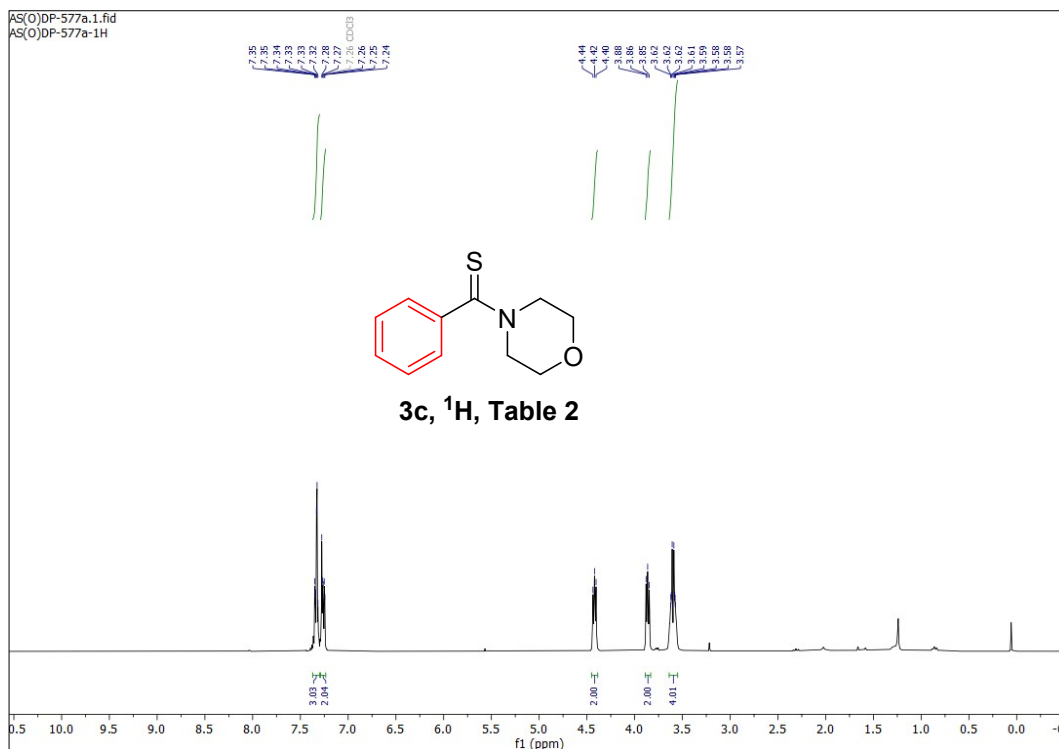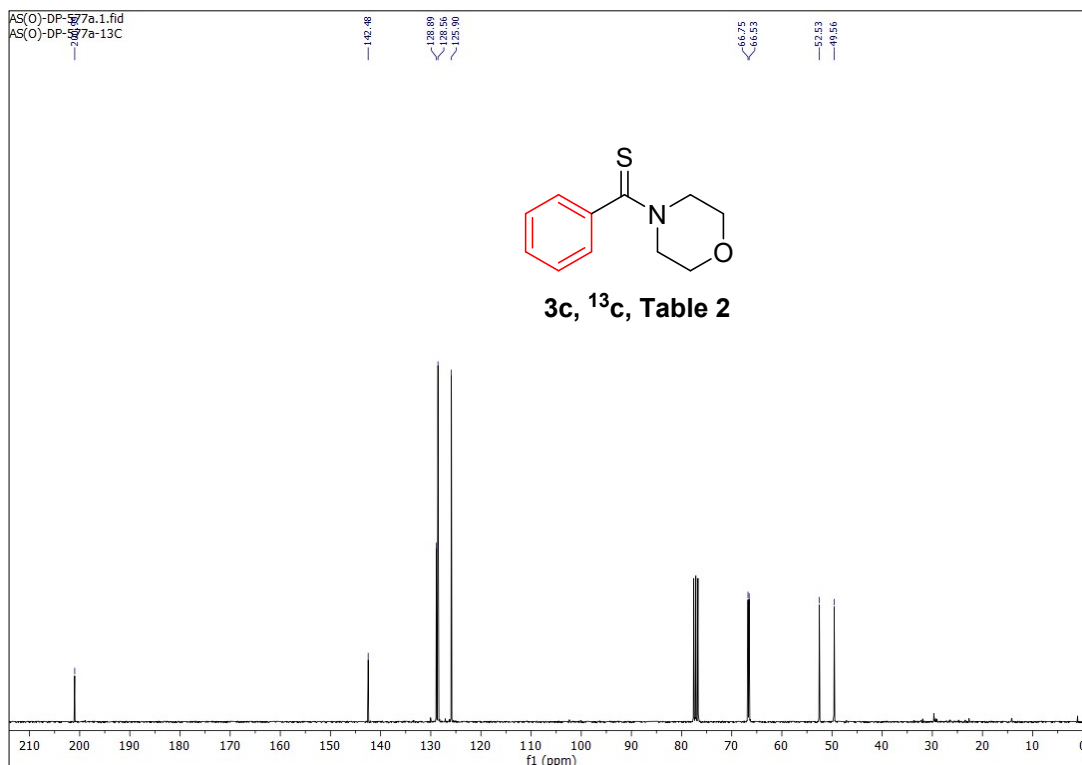

**<sup>1</sup>H NMR (400 MHz, CDCl<sub>3</sub>) and <sup>13</sup>C NMR (100 MHz, CDCl<sub>3</sub>) spectrum of 3d**

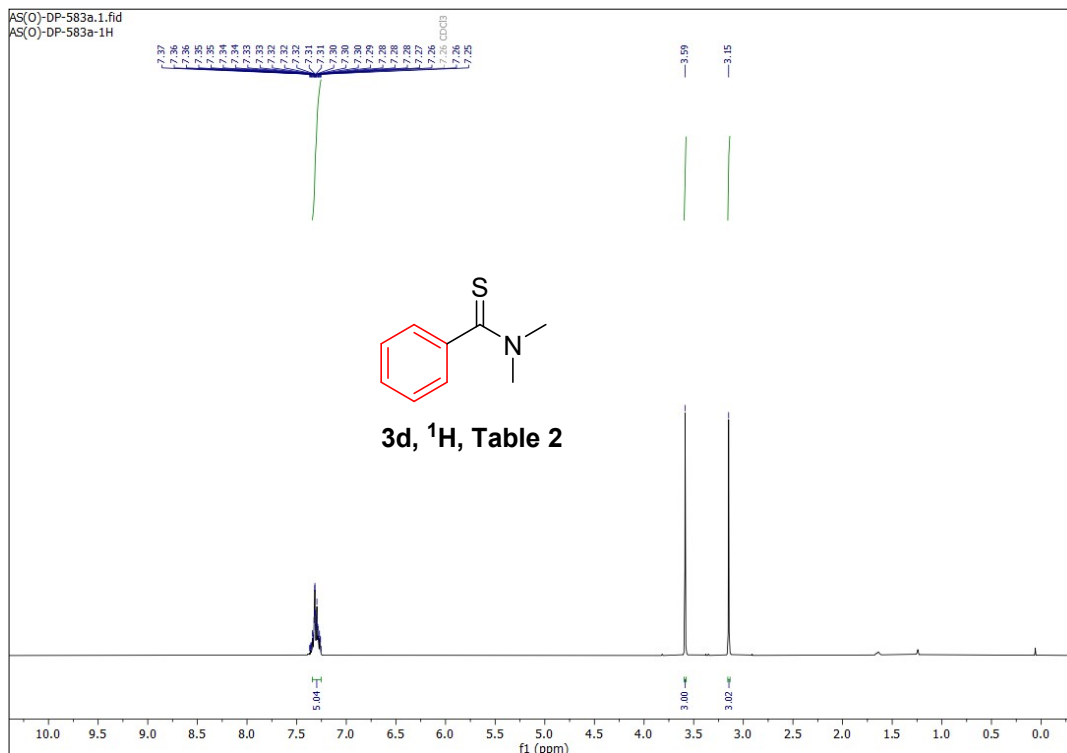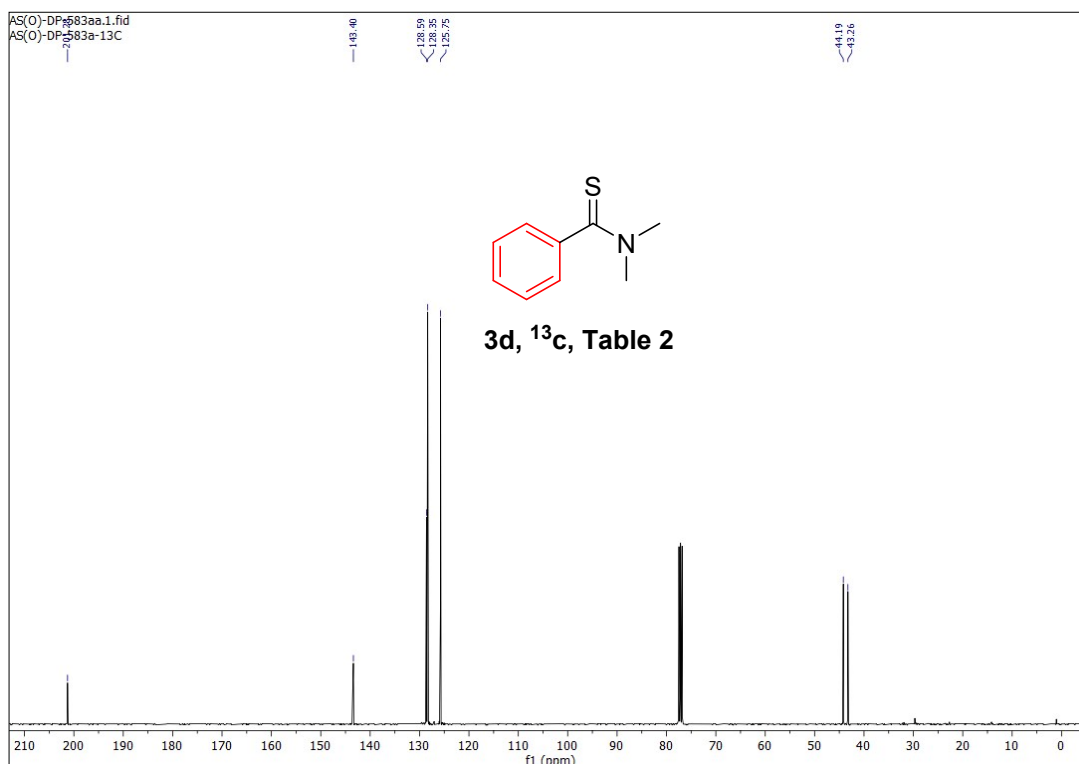

**$^1\text{H}$  NMR (400 MHz,  $\text{CDCl}_3$ ) and  $^{13}\text{C}$  NMR (100 MHz,  $\text{CDCl}_3$ ) spectrum of **3e****

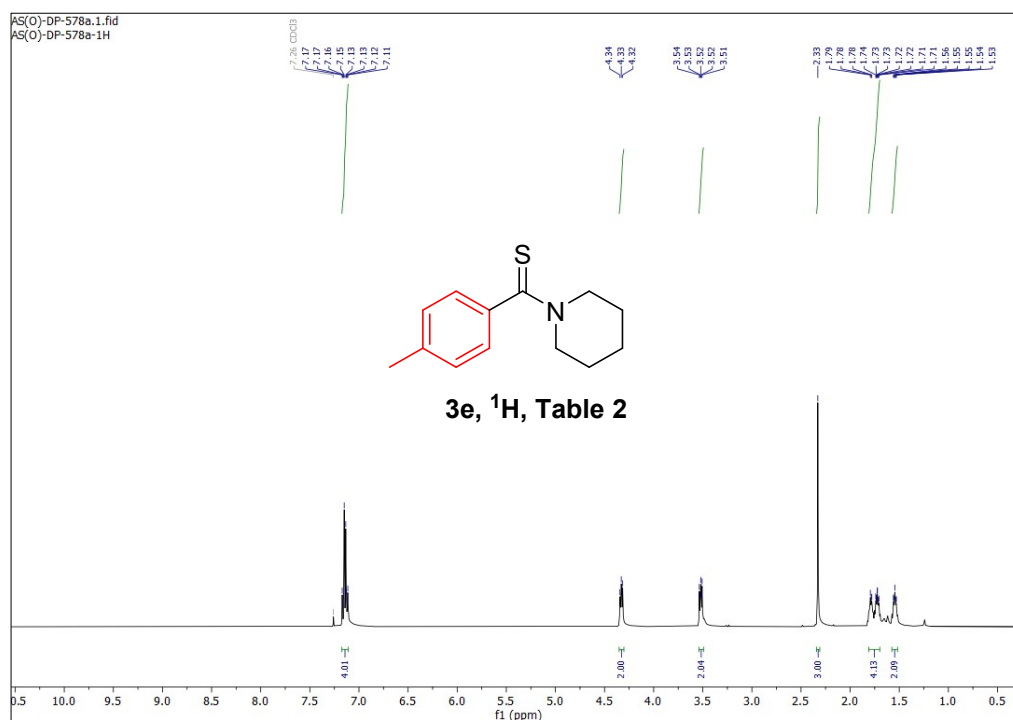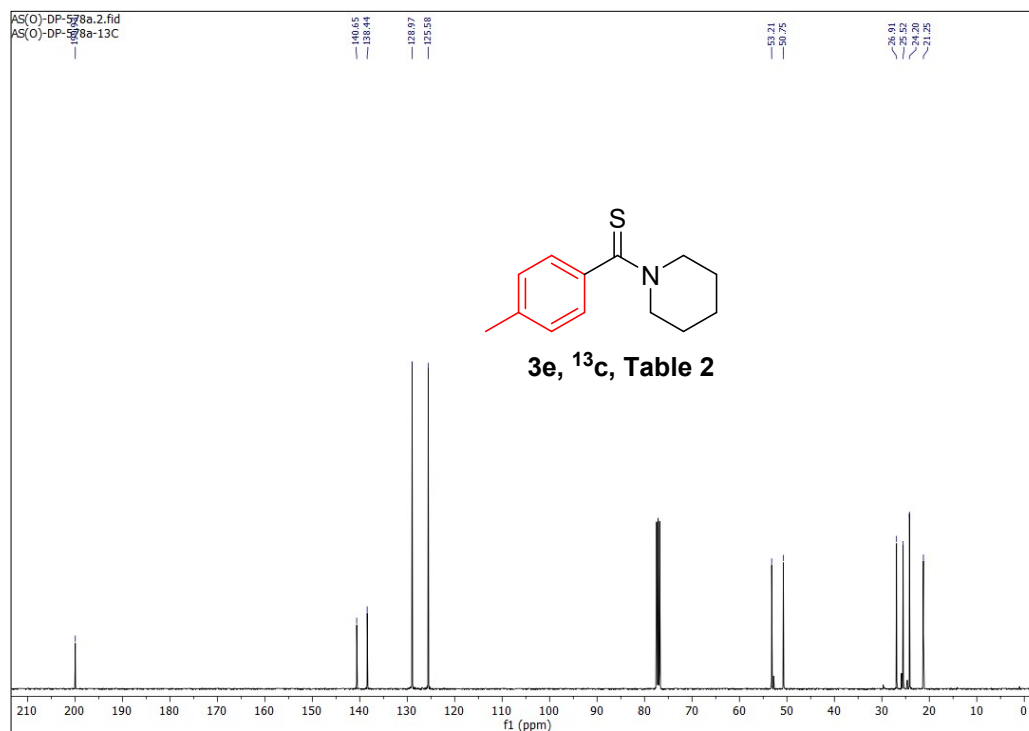

# <sup>1</sup>H NMR (400 MHz, CDCl<sub>3</sub>) and <sup>13</sup>C NMR (100 MHz, CDCl<sub>3</sub>) spectrum of 3f

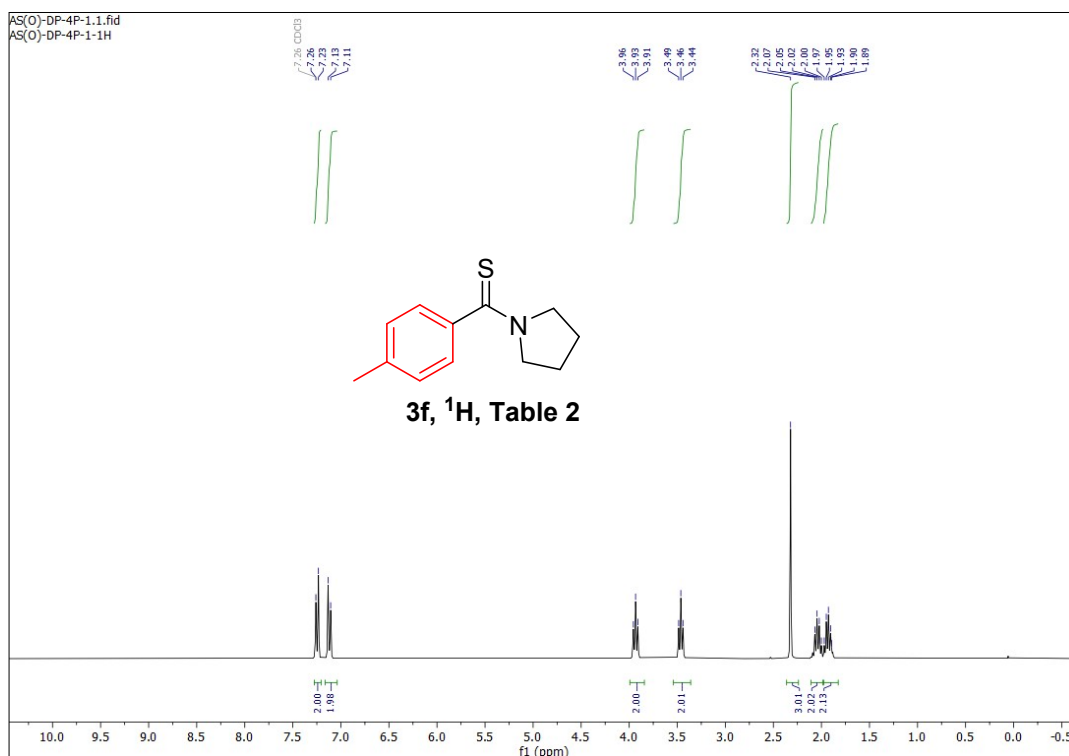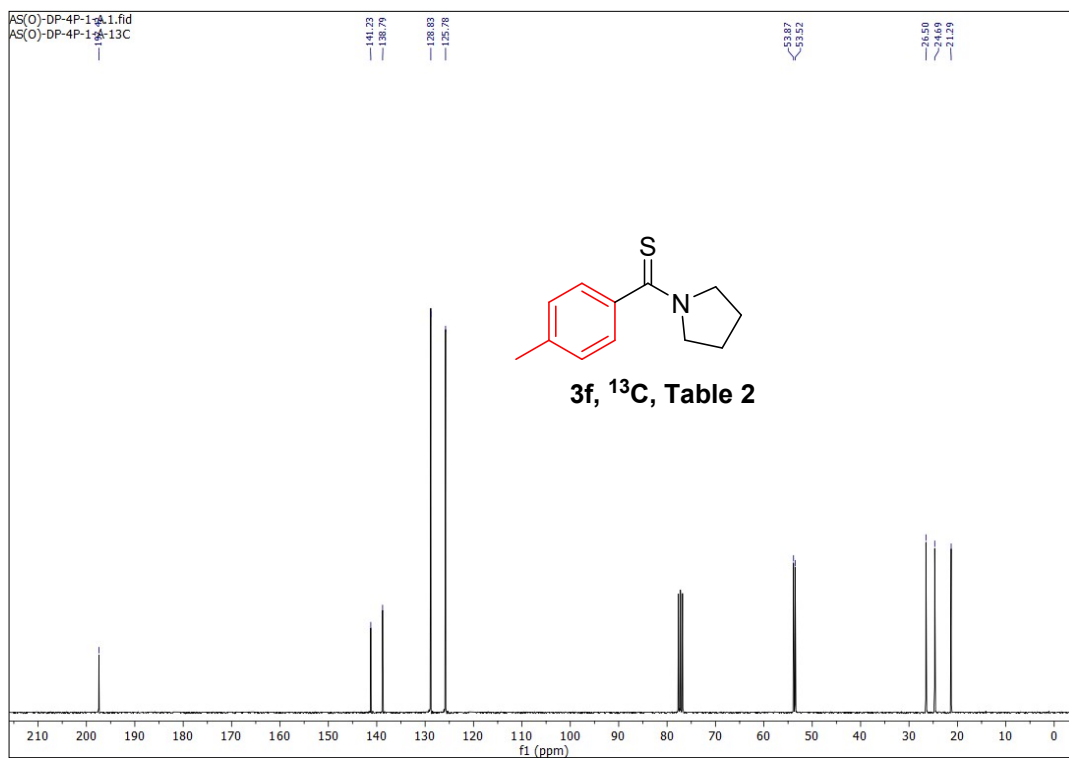

**$^1\text{H}$  NMR (400 MHz,  $\text{CDCl}_3$ ) and  $^{13}\text{C}$  NMR (100 MHz,  $\text{CDCl}_3$ ) spectrum of **3g****

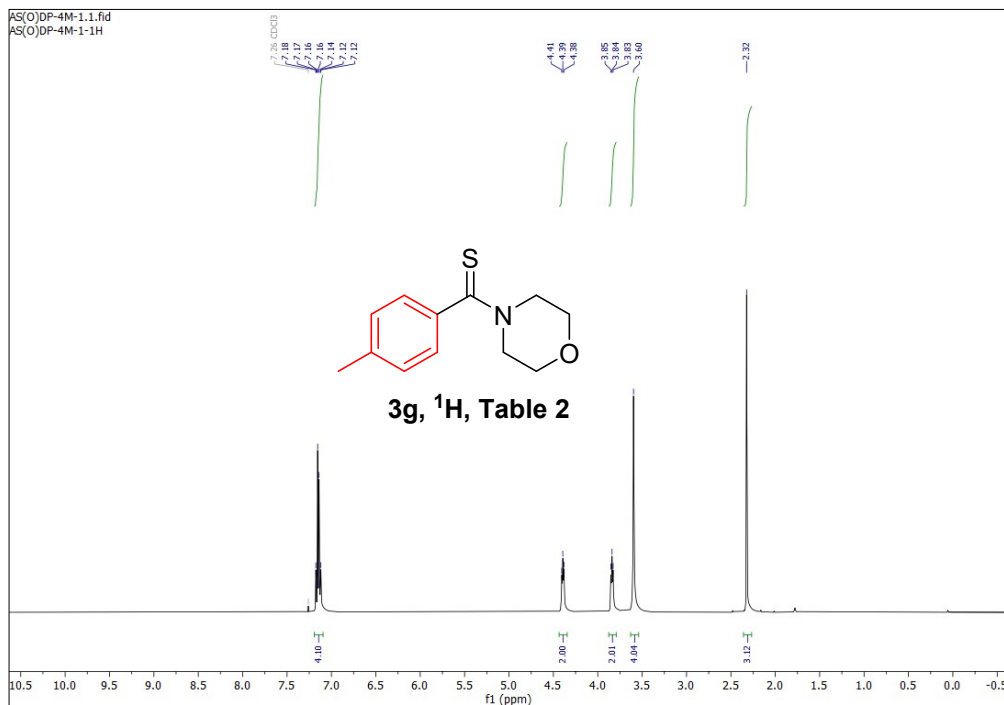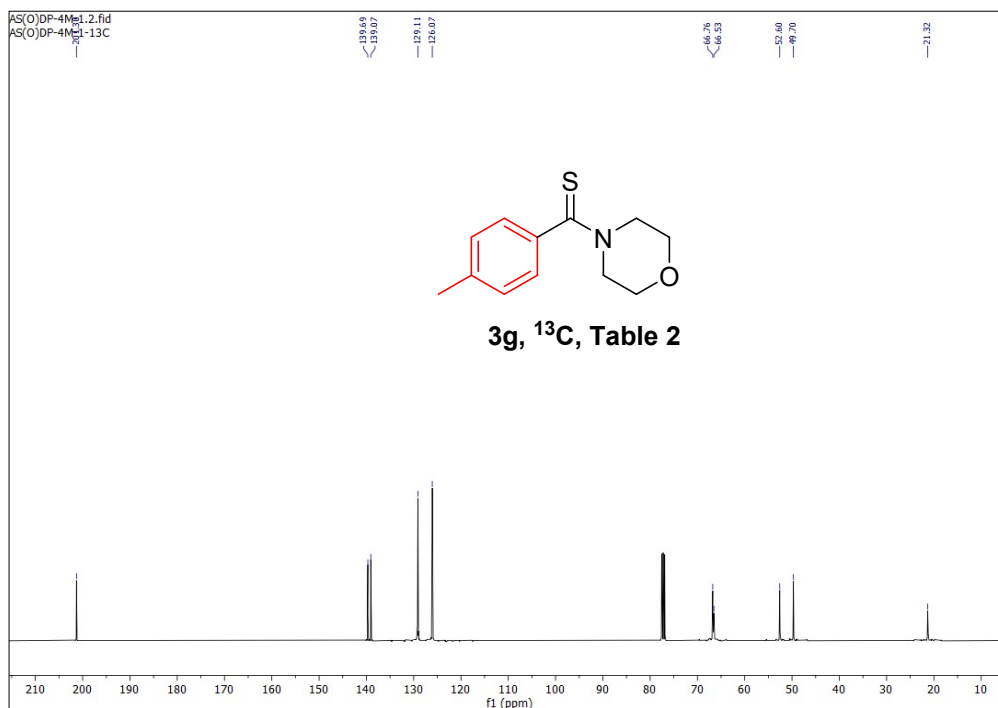



# <sup>1</sup>H NMR (400 MHz, CDCl<sub>3</sub>) and <sup>13</sup>C NMR (100 MHz, CDCl<sub>3</sub>) spectrum of 3h

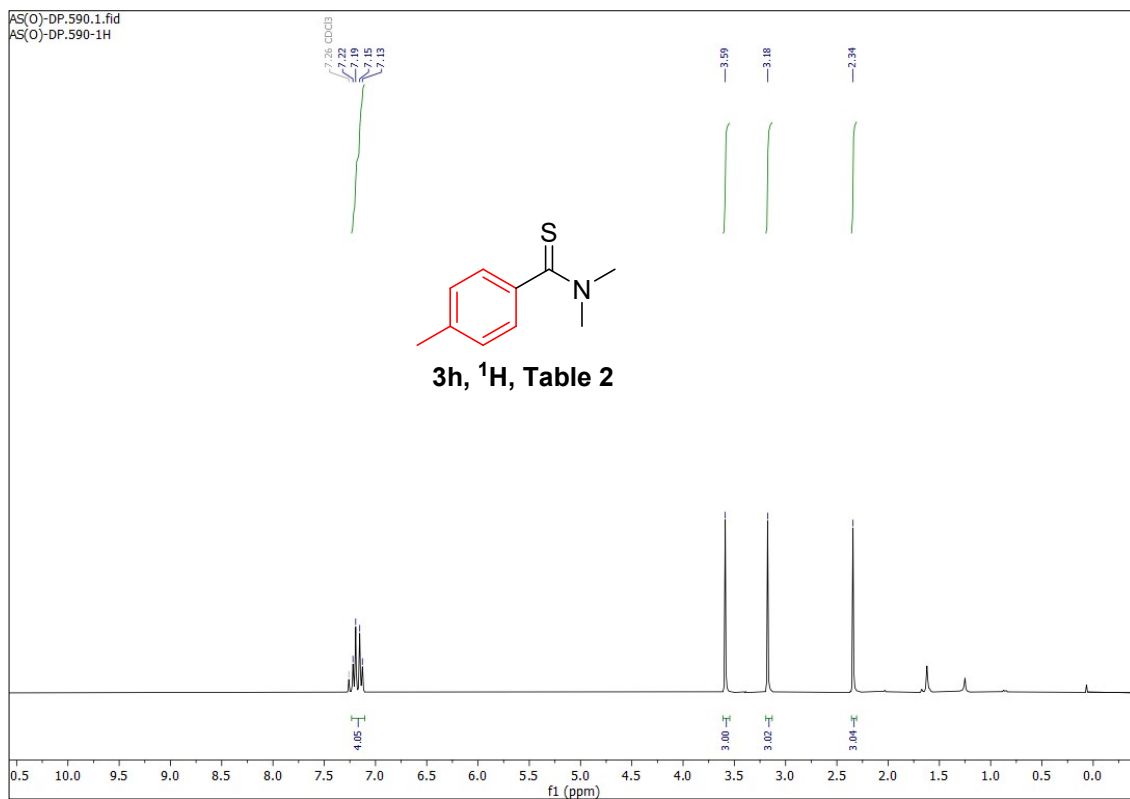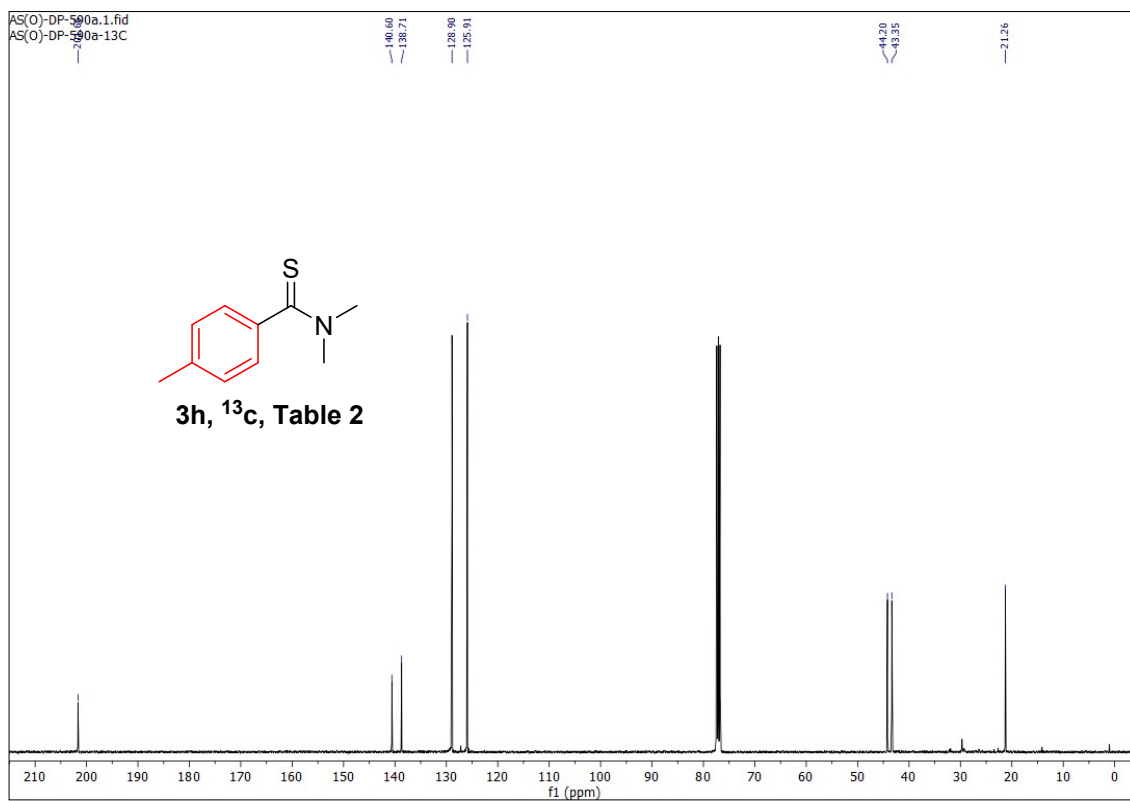

**<sup>1</sup>H NMR (400 MHz, CDCl<sub>3</sub>) and <sup>13</sup>C NMR (100 MHz, CDCl<sub>3</sub>) spectrum of 3i**

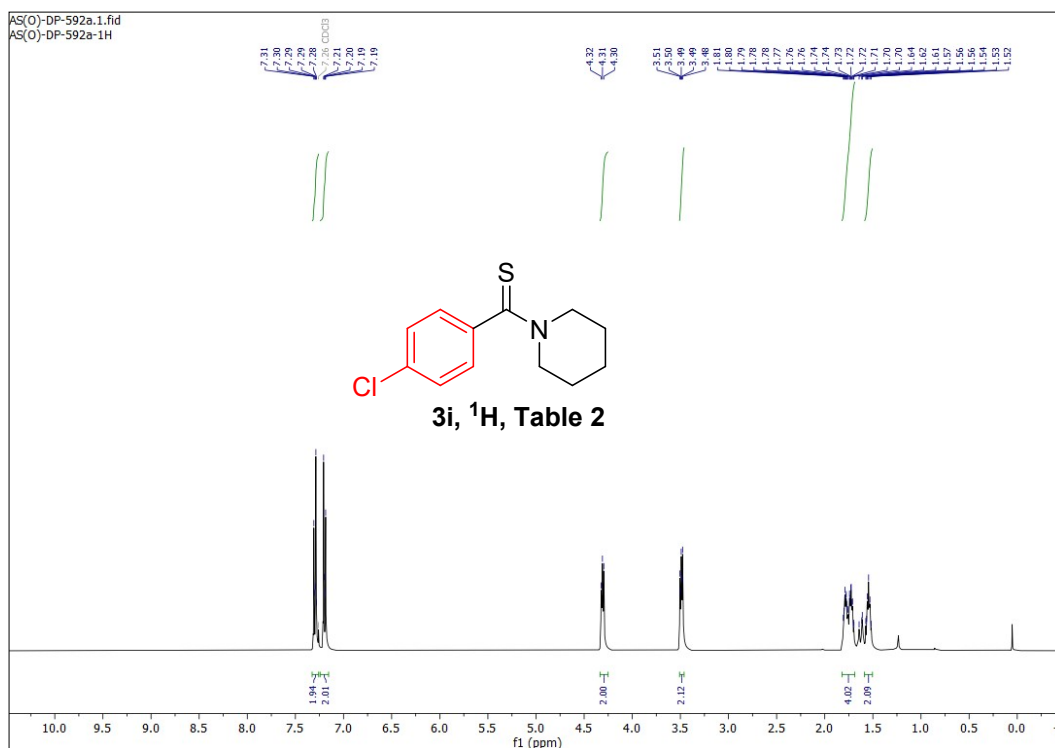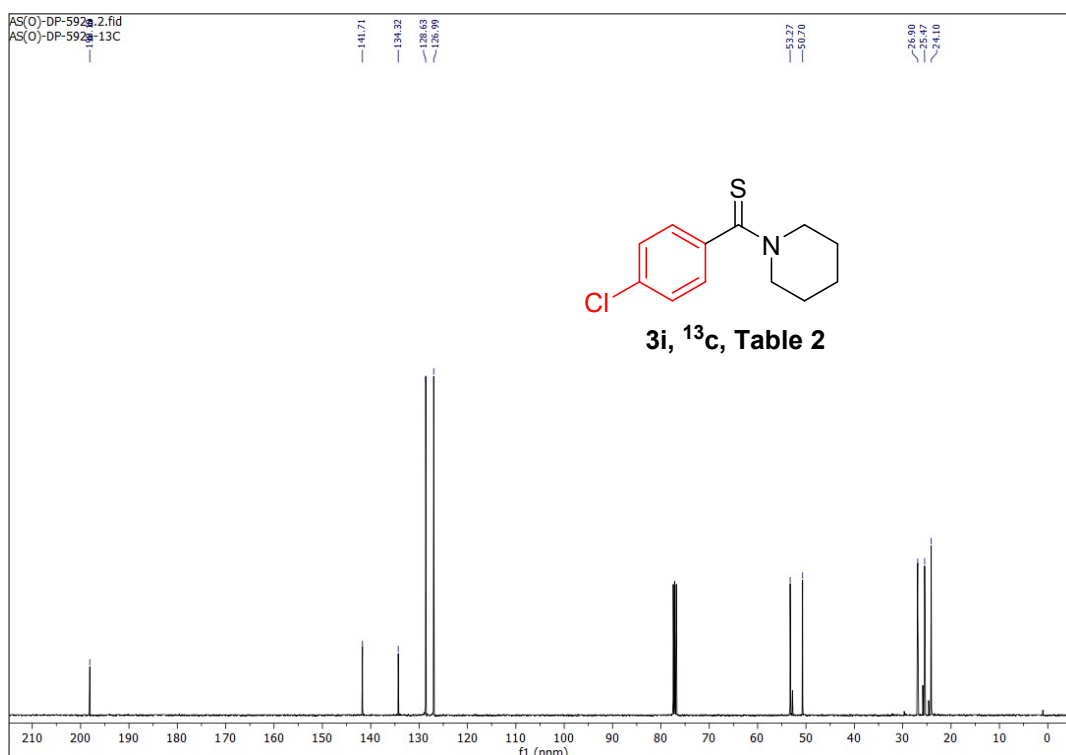

# $^1\text{H}$ NMR (400 MHz, $\text{CDCl}_3$ ) and $^{13}\text{C}$ NMR (100 MHz, $\text{CDCl}_3$ ) spectrum of **3j**

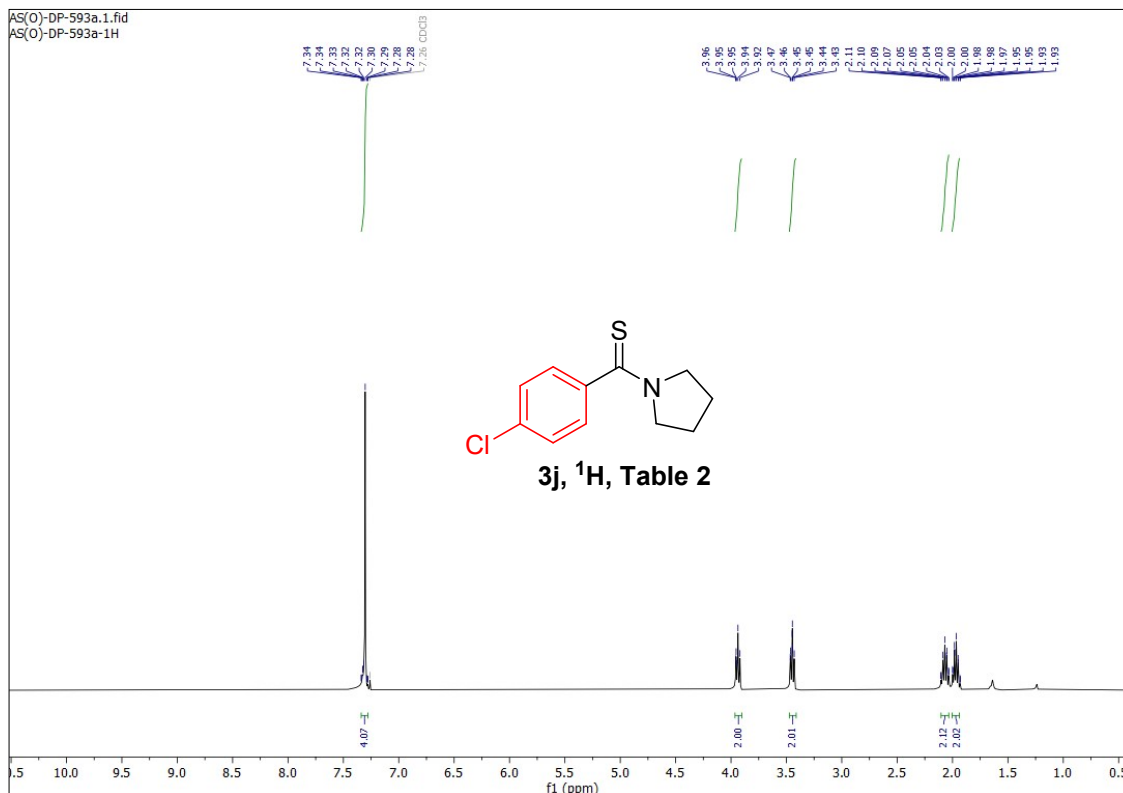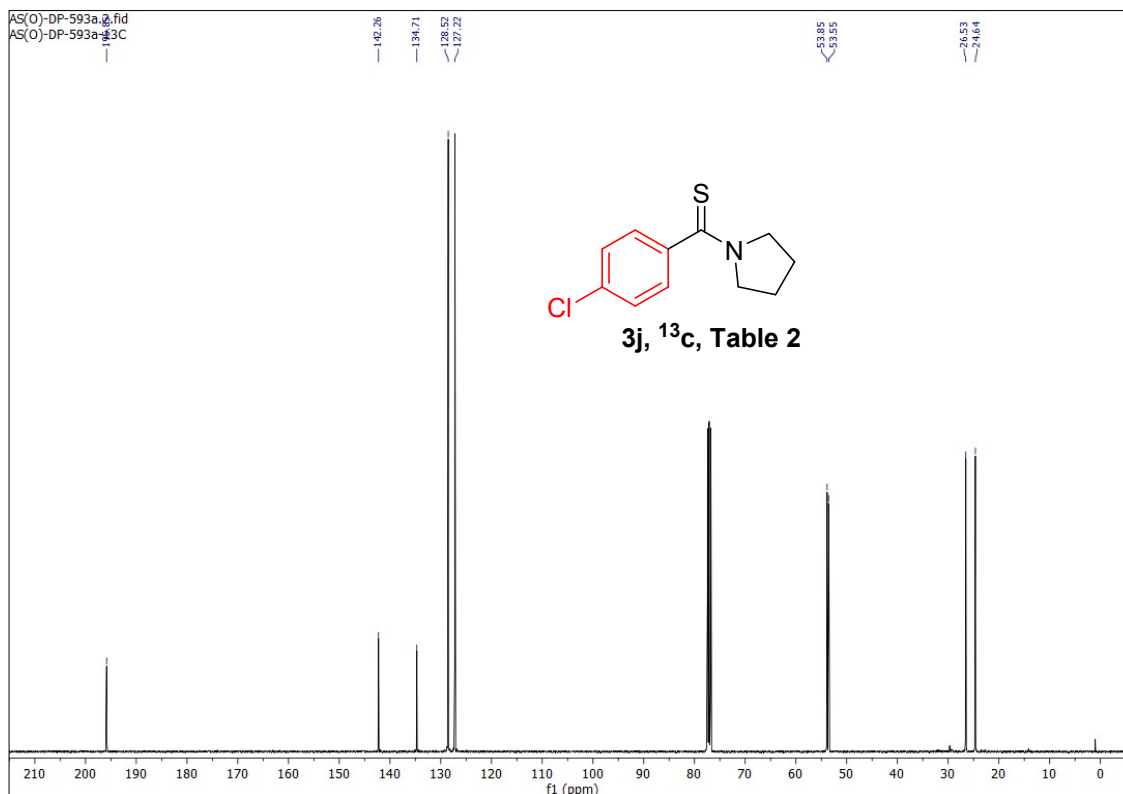

**<sup>1</sup>H NMR (300 MHz, CDCl<sub>3</sub>) and <sup>13</sup>C NMR (75 MHz, CDCl<sub>3</sub>) spectrum of 3k**

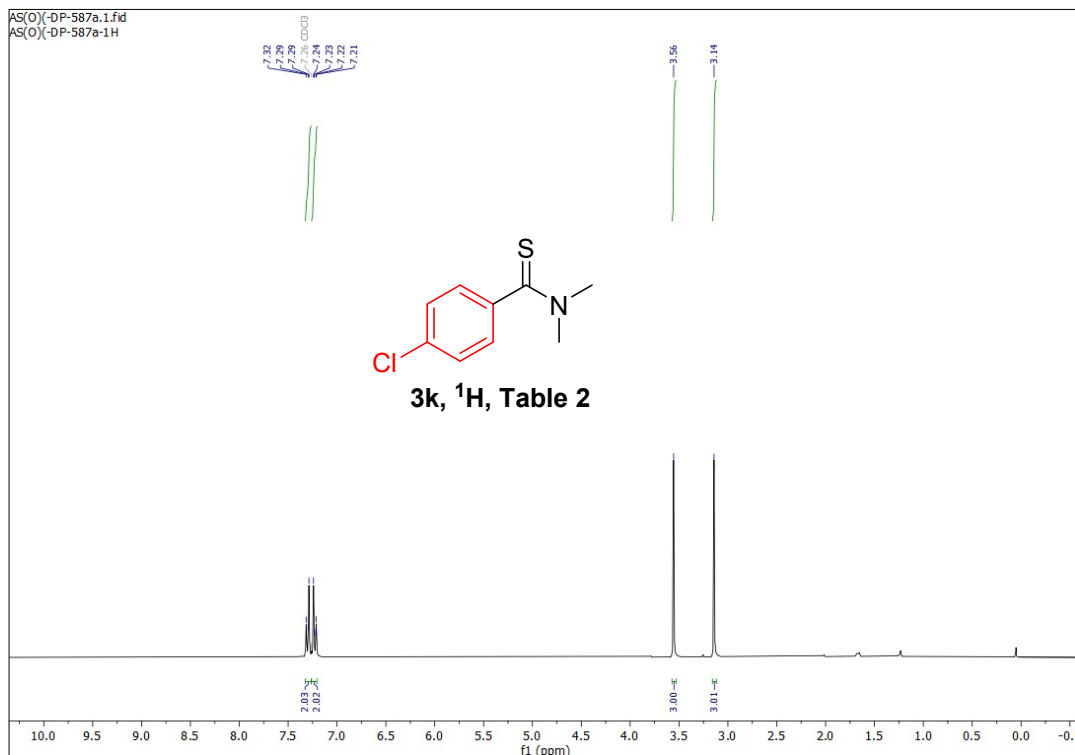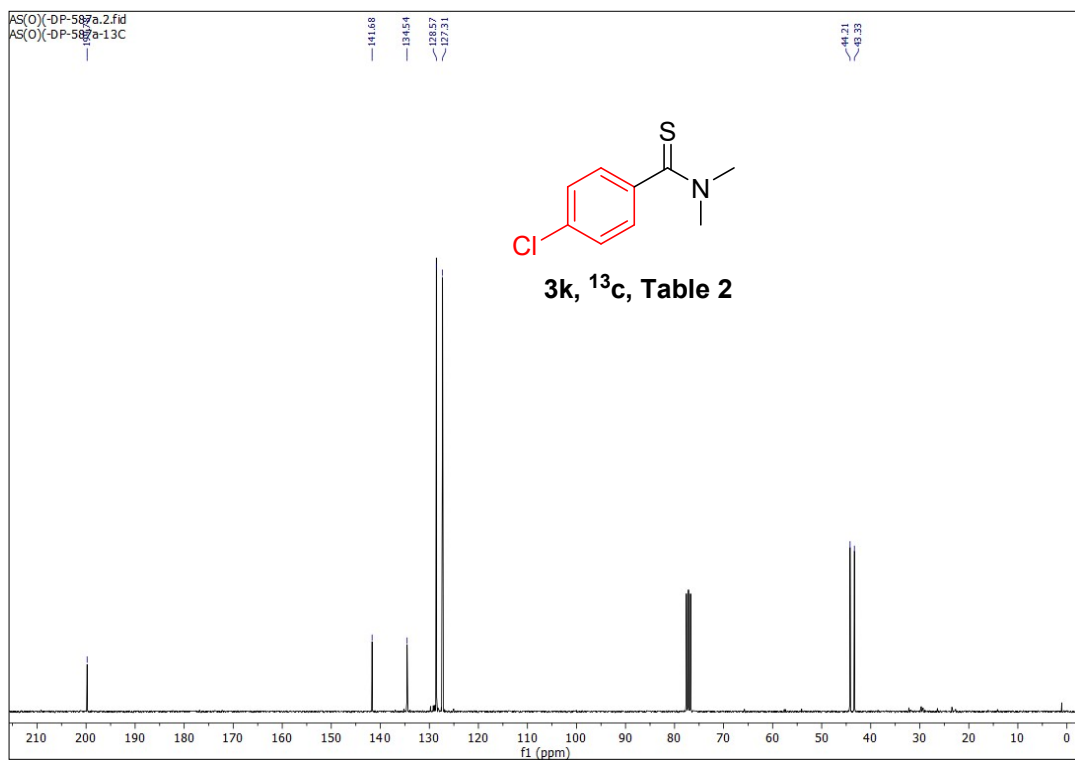

# $^1\text{H}$ NMR (300 MHz, $\text{CDCl}_3$ ) and $^{13}\text{C}$ NMR (75 MHz, $\text{CDCl}_3$ ) spectrum of 3l

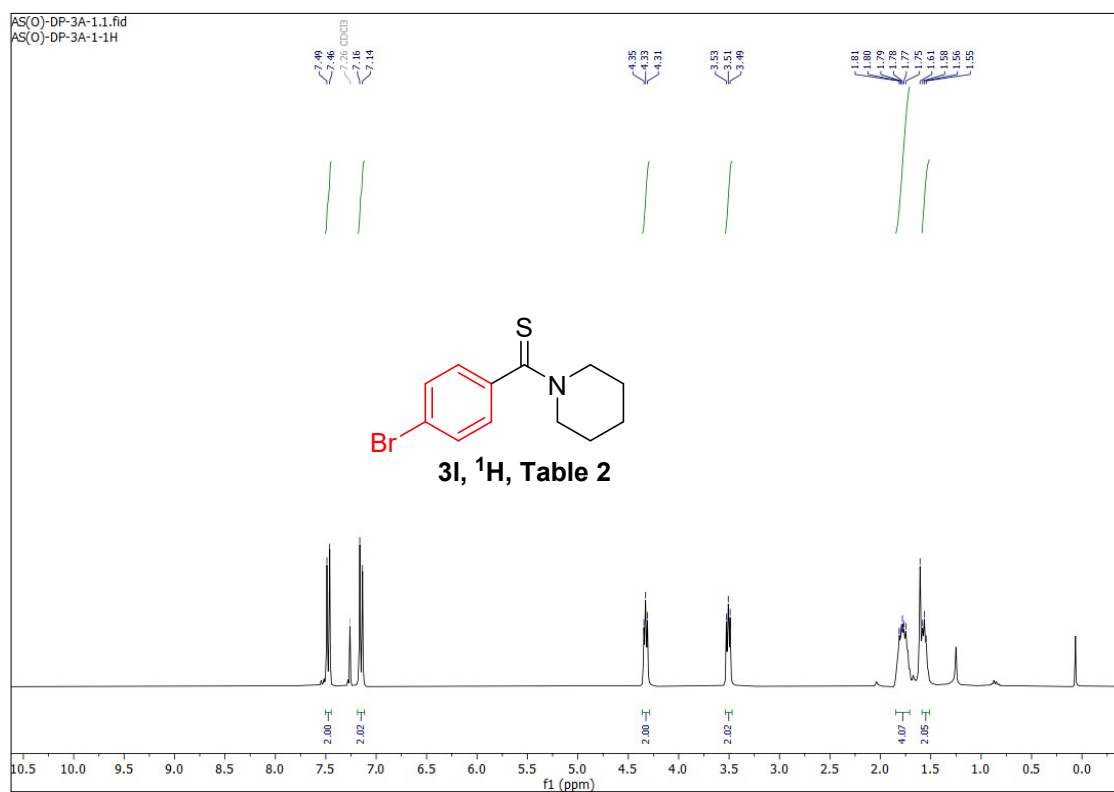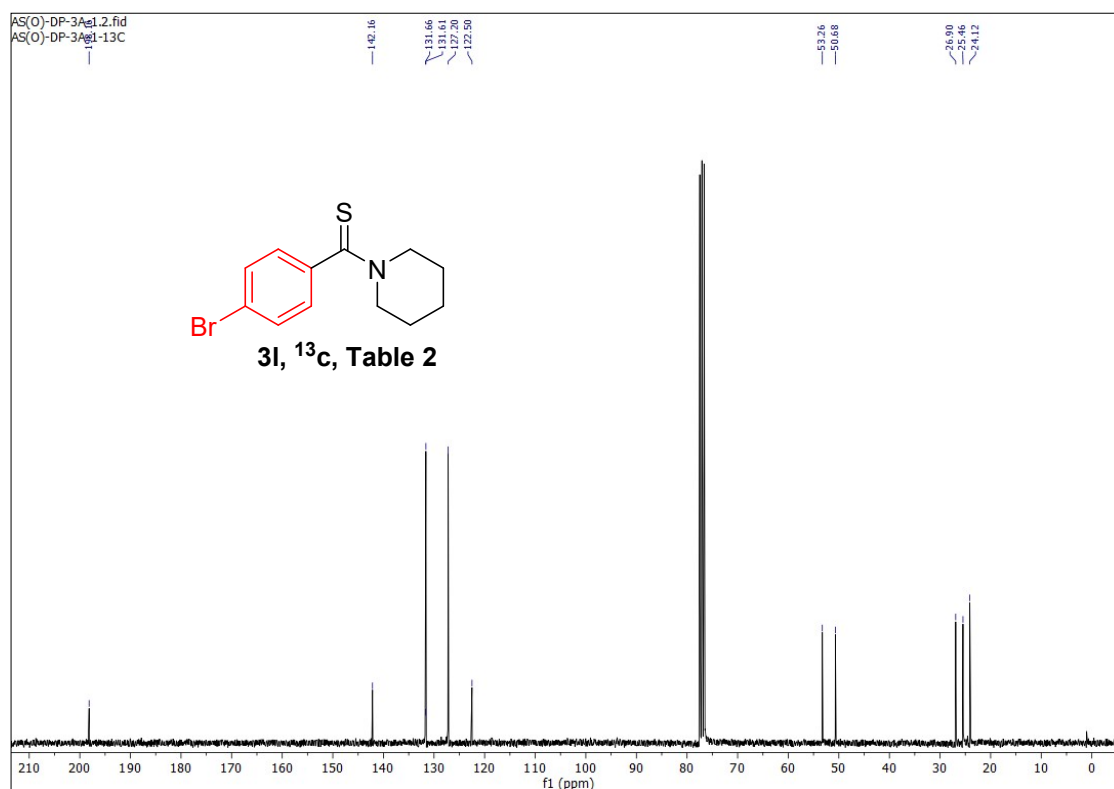

**<sup>1</sup>H NMR (300 MHz, CDCl<sub>3</sub>) and <sup>13</sup>C NMR (75 MHz, CDCl<sub>3</sub>) spectrum of 3m**

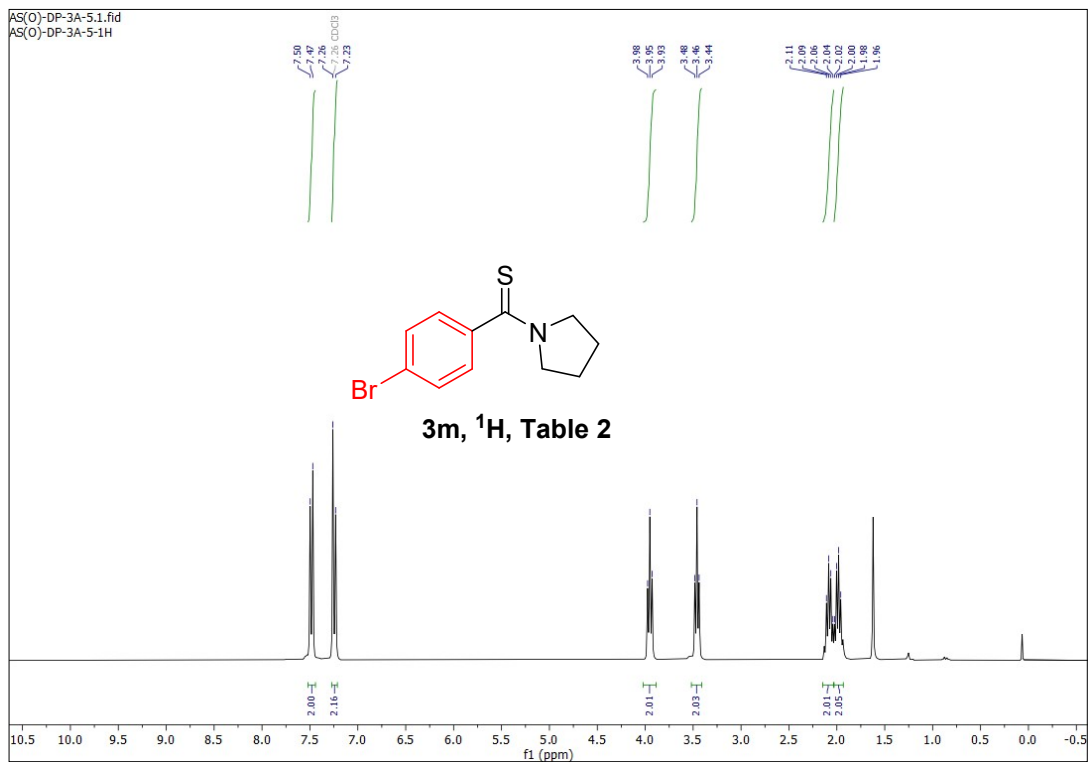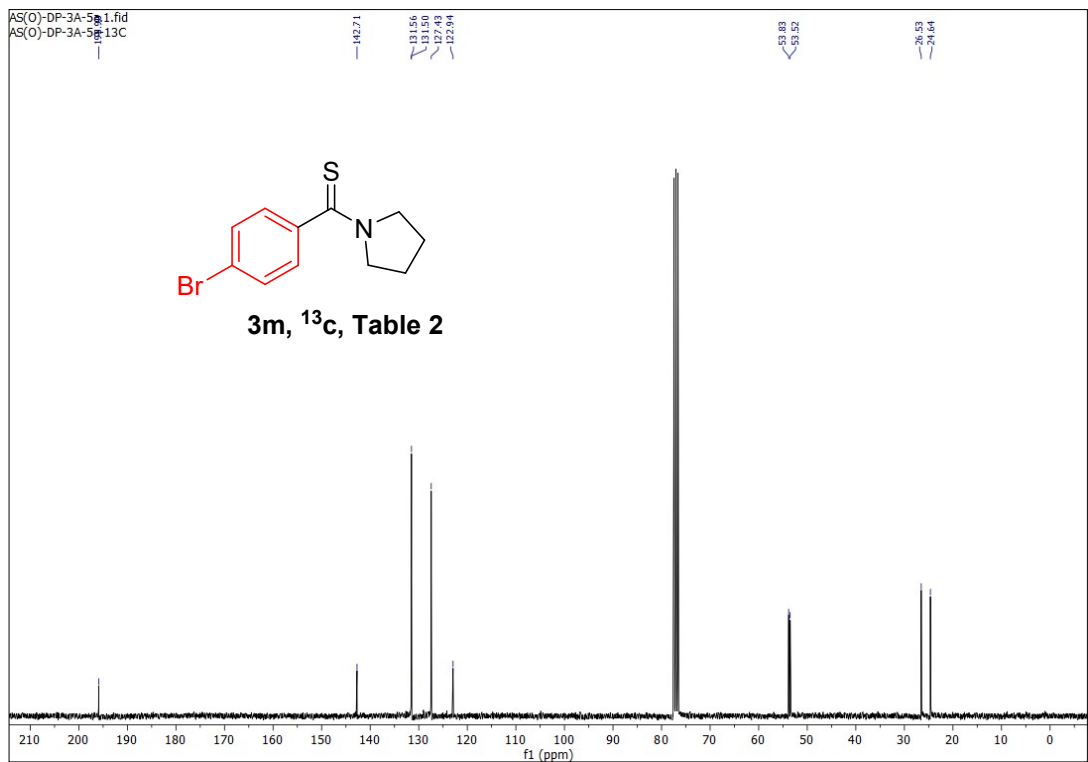

**$^1\text{H}$  NMR (400 MHz,  $\text{CDCl}_3$ ) and  $^{13}\text{C}$  NMR (100 MHz,  $\text{CDCl}_3$ ) spectrum of **3n****

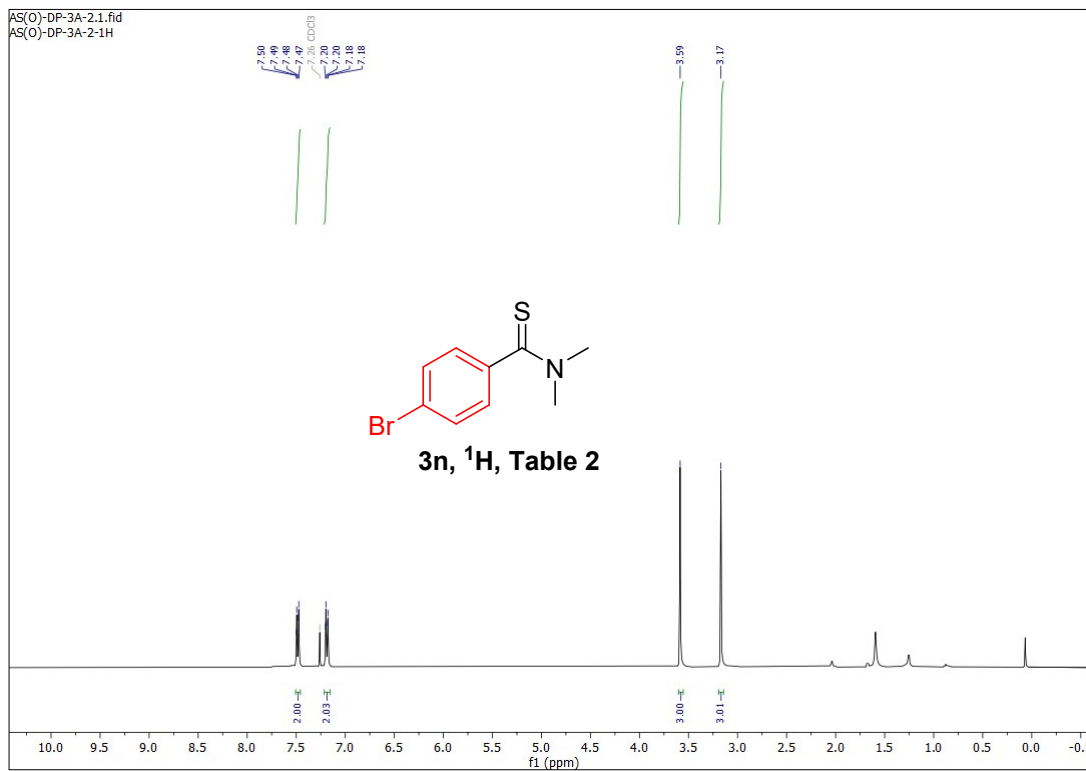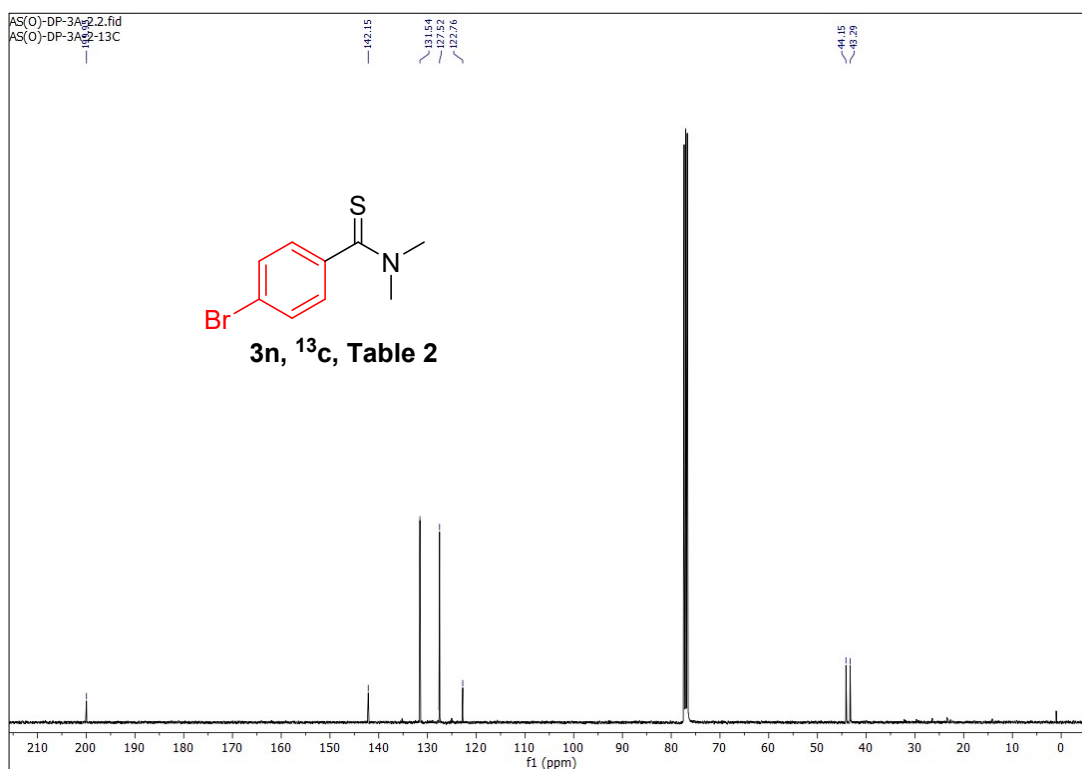

# $^1\text{H}$ NMR (300 MHz, $\text{CDCl}_3$ ) and $^{13}\text{C}$ NMR (75 MHz, $\text{CDCl}_3$ ) spectrum of **3o**

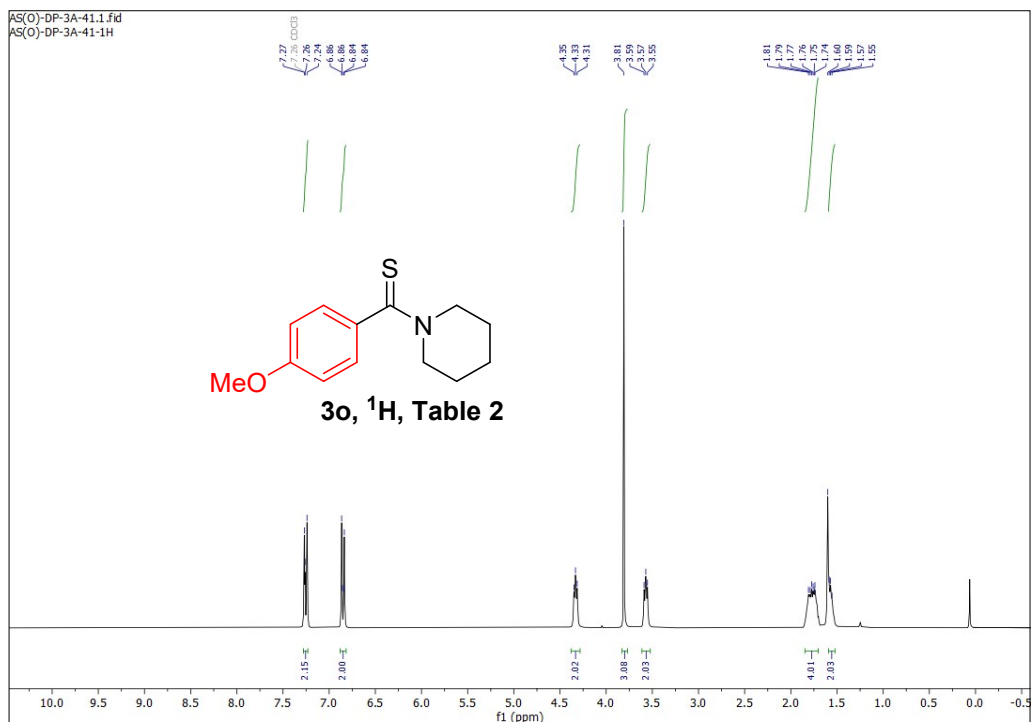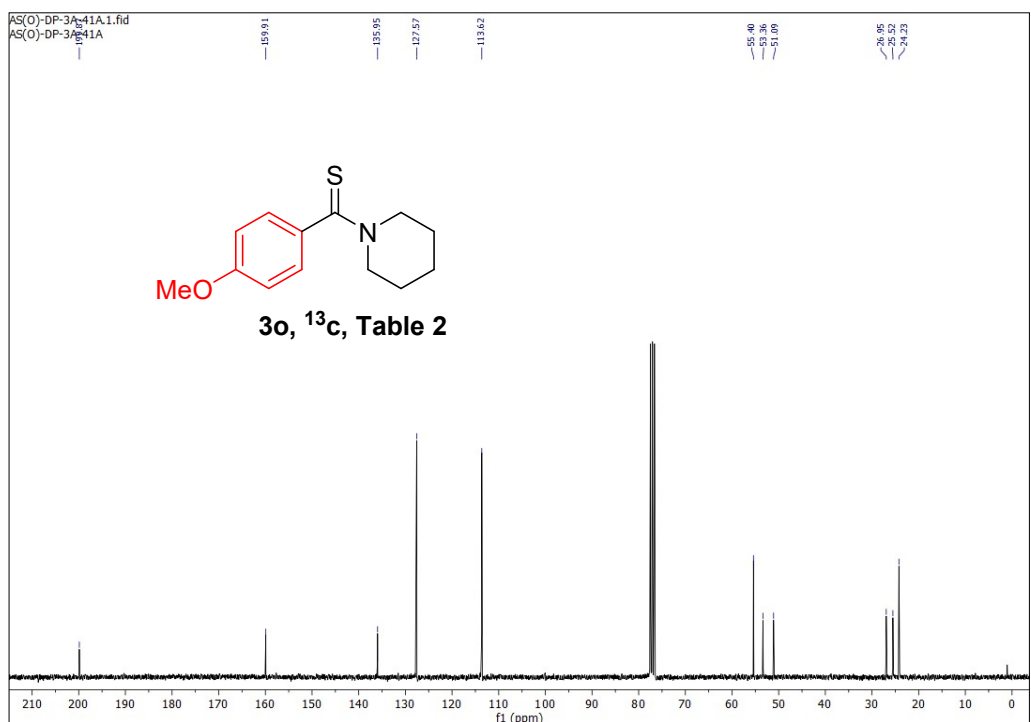



**<sup>1</sup>H NMR (400 MHz, CDCl<sub>3</sub>) and <sup>13</sup>C NMR (100 MHz, CDCl<sub>3</sub>) spectrum of 3p**

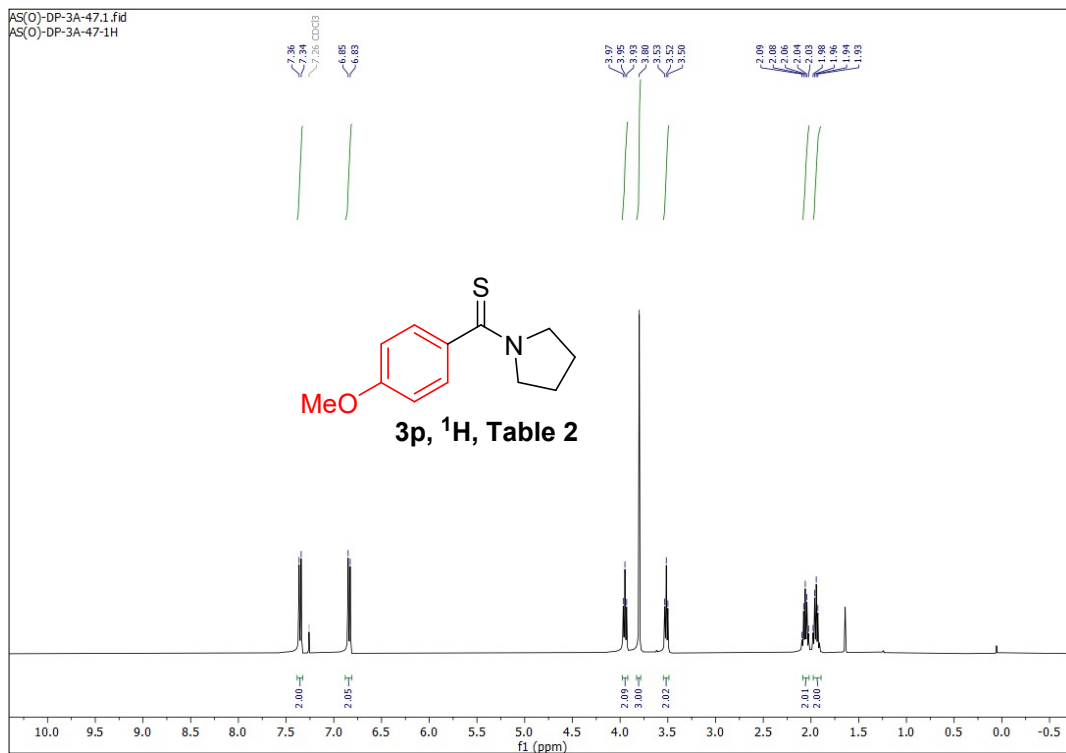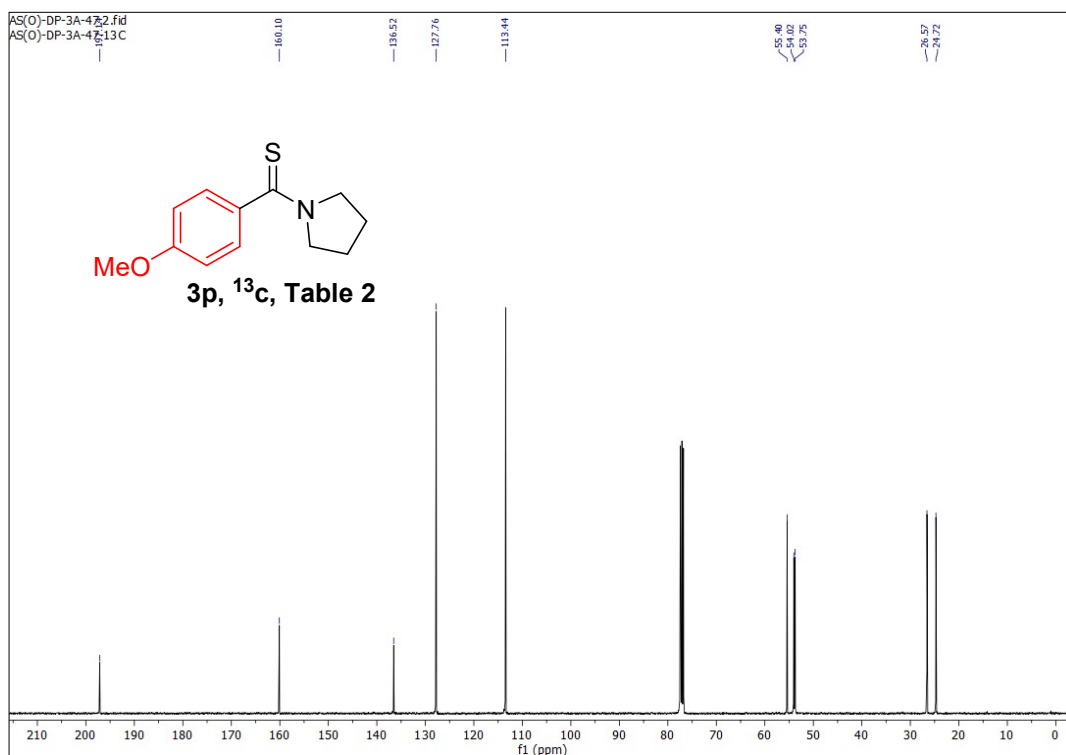

# $^1\text{H}$ NMR (400 MHz, $\text{CDCl}_3$ ) and $^{13}\text{C}$ NMR (100 MHz, $\text{CDCl}_3$ ) spectrum of **3q**

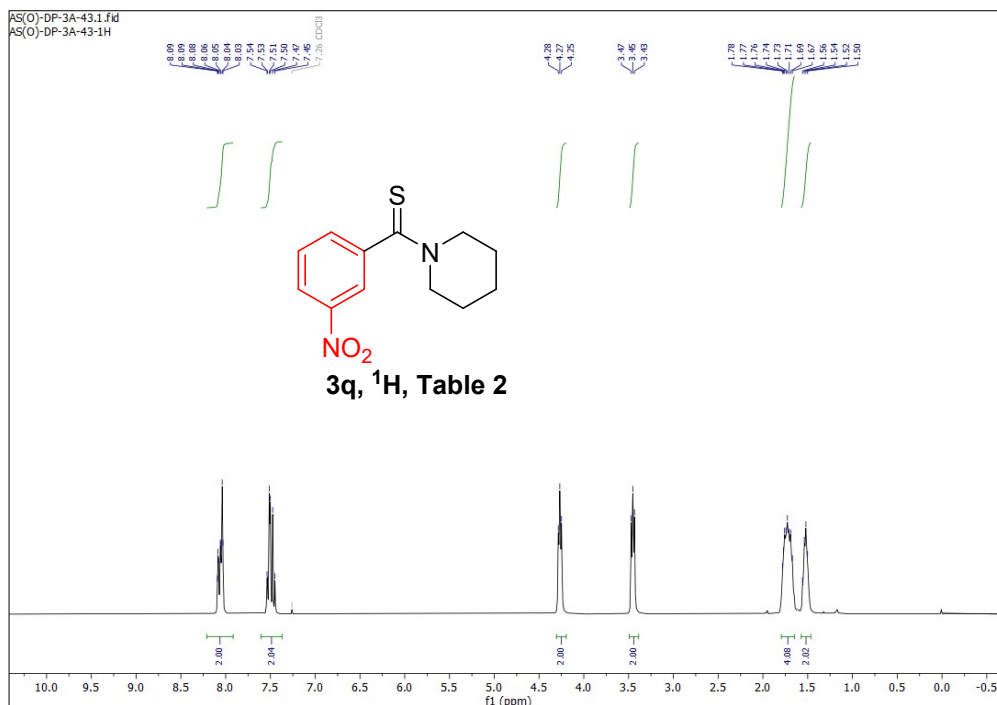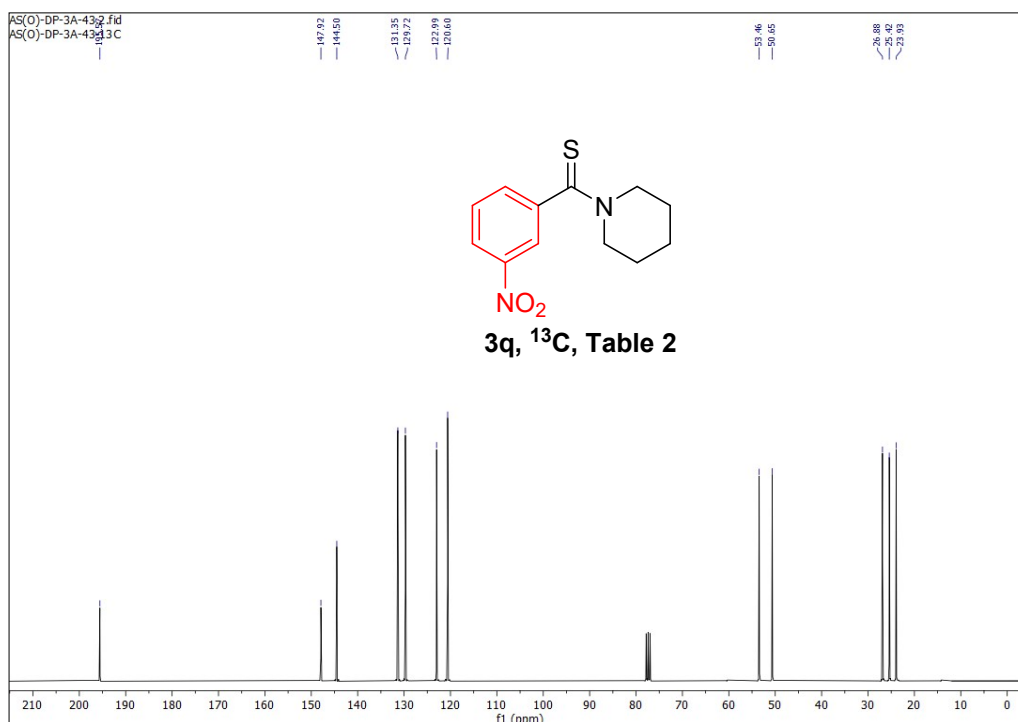

# $^1\text{H}$ NMR (400 MHz, $\text{CDCl}_3$ ) and $^{13}\text{C}$ NMR (100 MHz, $\text{CDCl}_3$ ) spectrum of **3r**

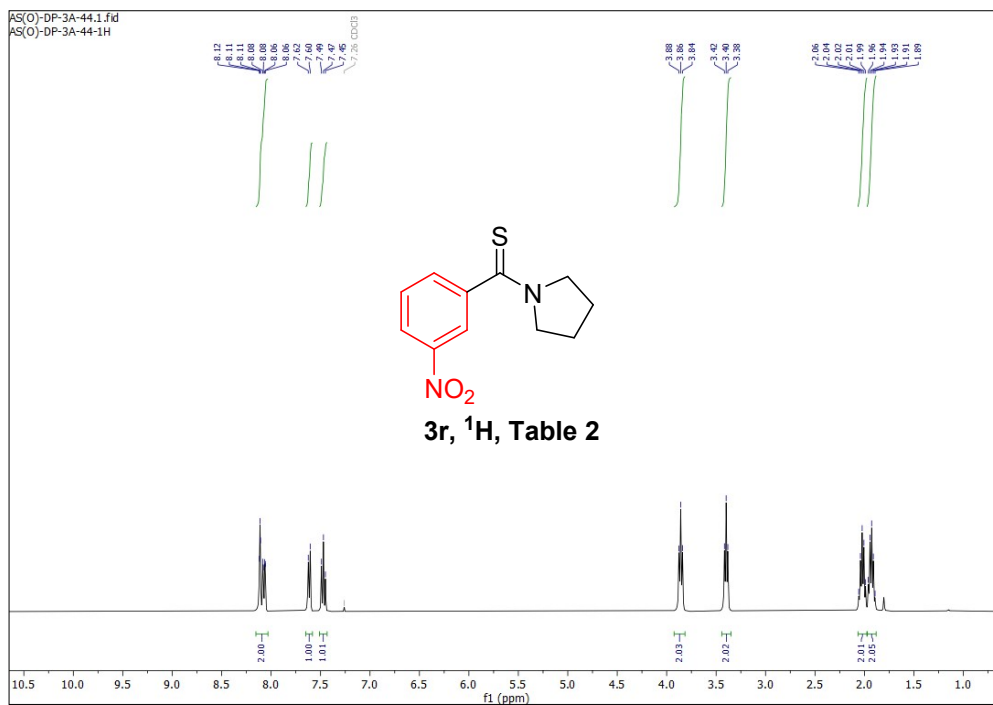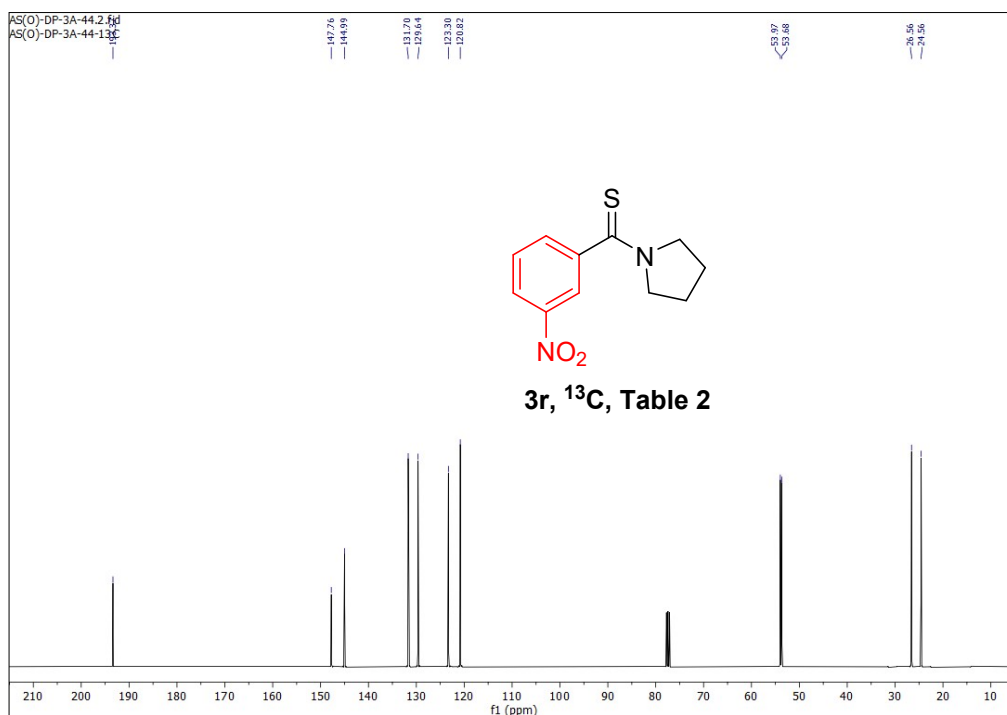

**<sup>1</sup>H NMR (400 MHz, CDCl<sub>3</sub>) and <sup>13</sup>C NMR (100 MHz, CDCl<sub>3</sub>) spectrum of 3s**

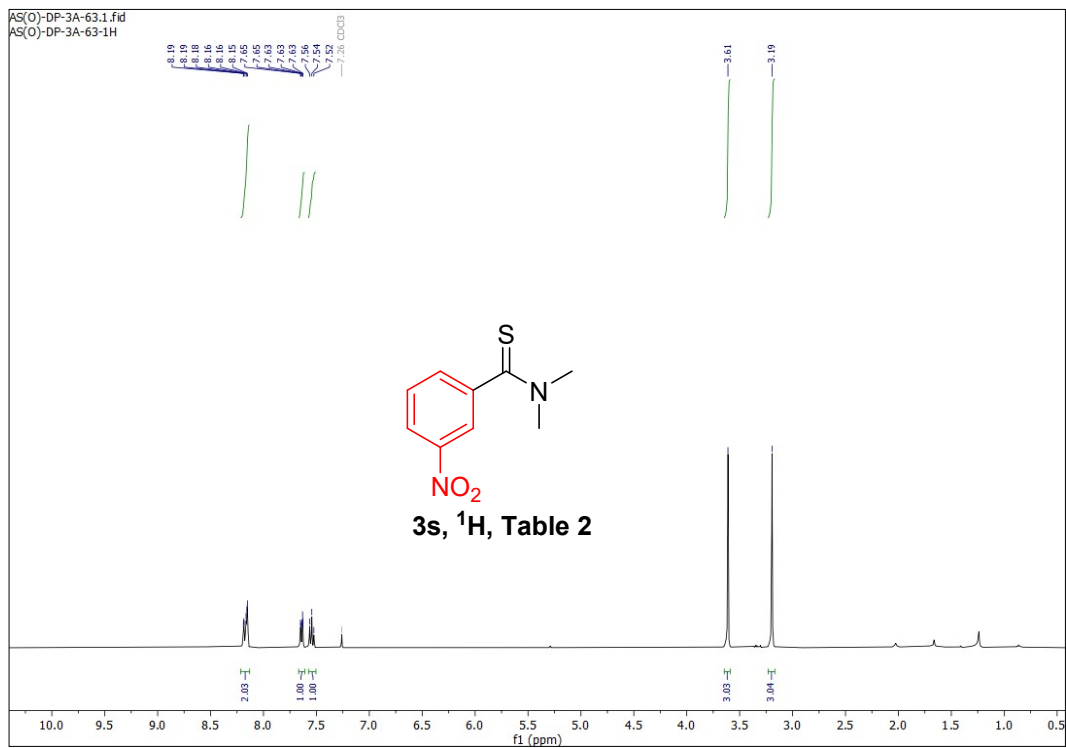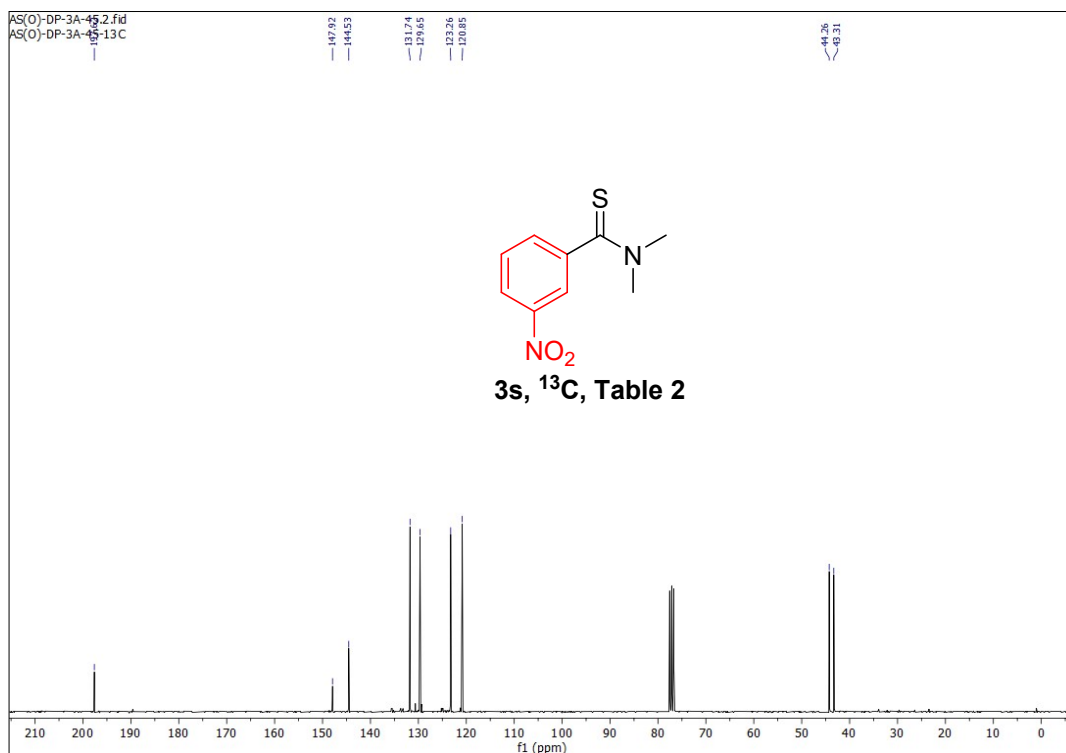

**$^1\text{H}$  NMR (400 MHz,  $\text{CDCl}_3$ ) and  $^{13}\text{C}$  NMR (100 MHz,  $\text{CDCl}_3$ ) spectrum of 3t**

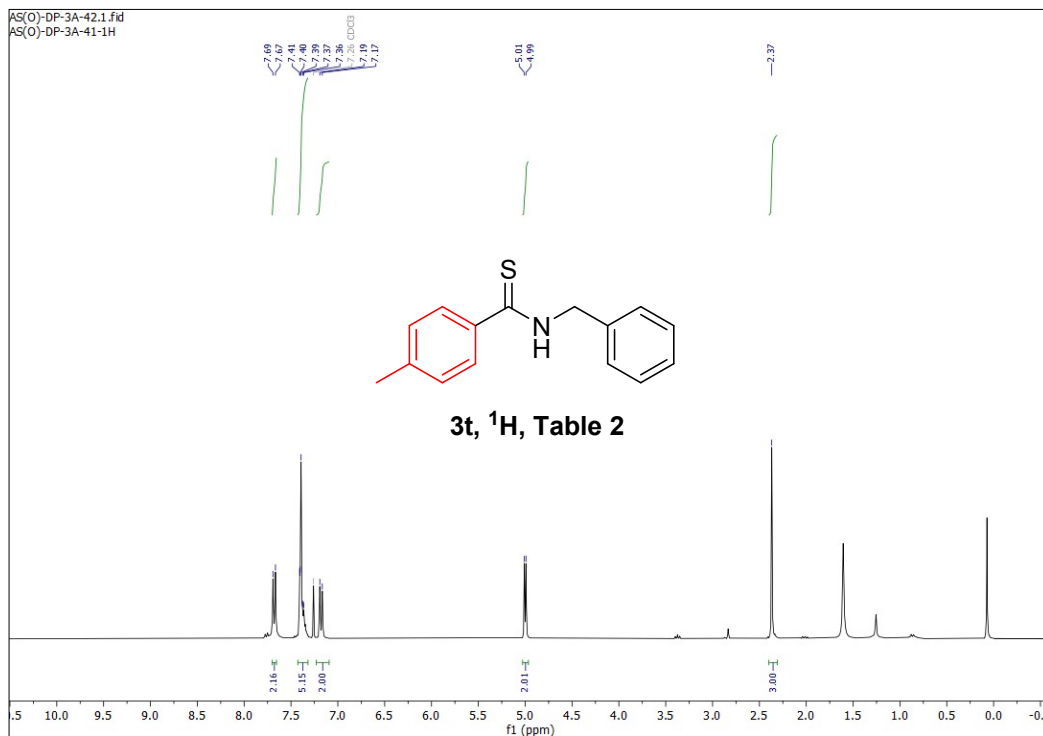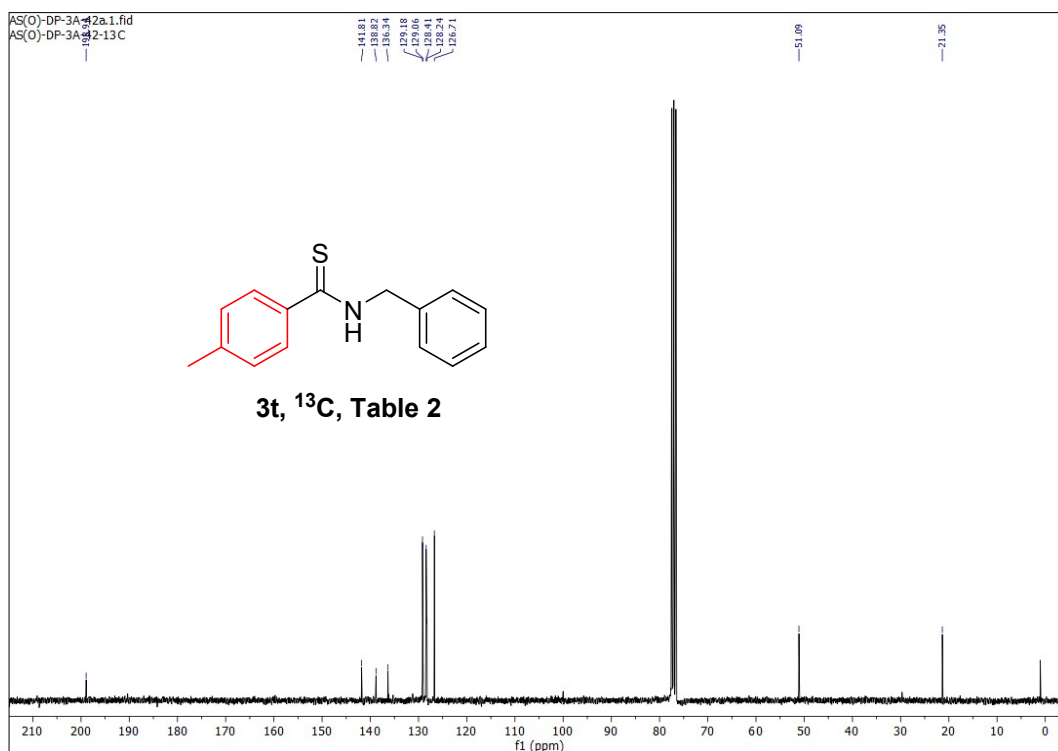

**$^1\text{H}$  NMR (400 MHz,  $\text{CDCl}_3$ ) and  $^{13}\text{C}$  NMR (100 MHz,  $\text{CDCl}_3$ ) spectrum of **3u****

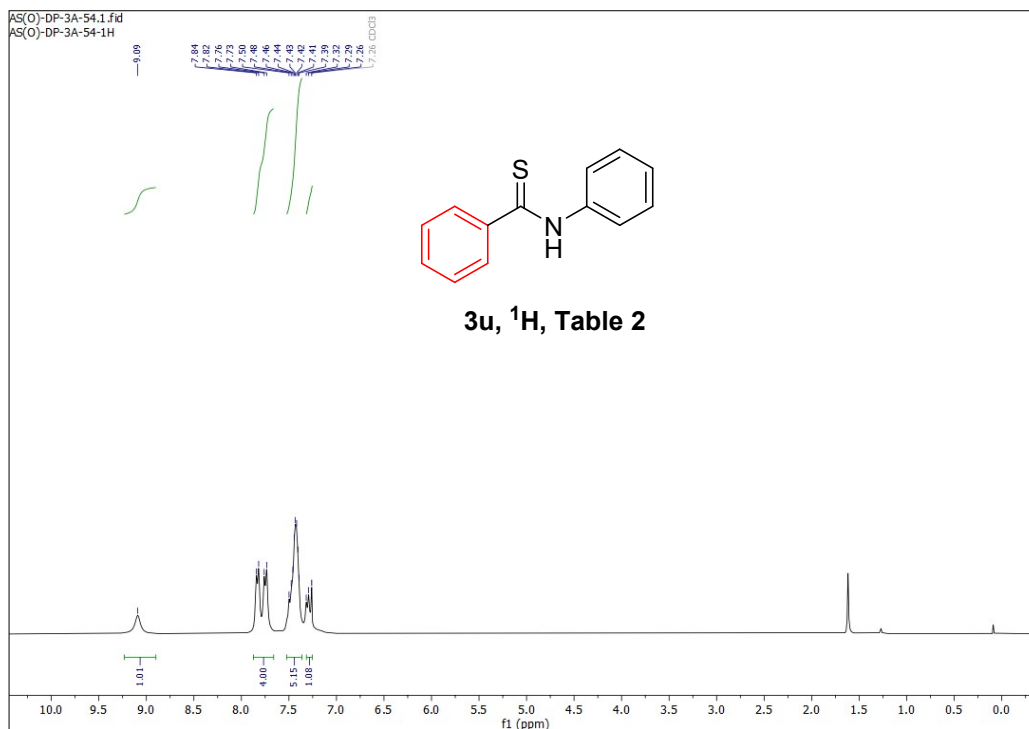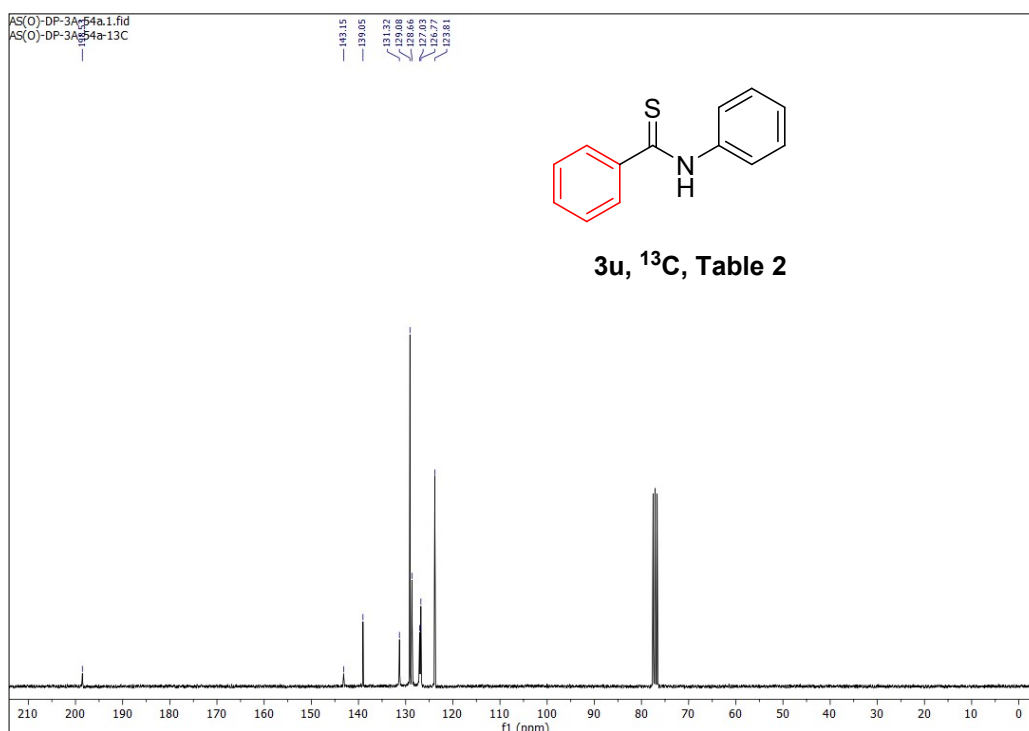

**$^1\text{H}$  NMR (400 MHz,  $\text{CDCl}_3$ ) and  $^{13}\text{C}$  NMR (100 MHz,  $\text{CDCl}_3$ ) spectrum of **3v****

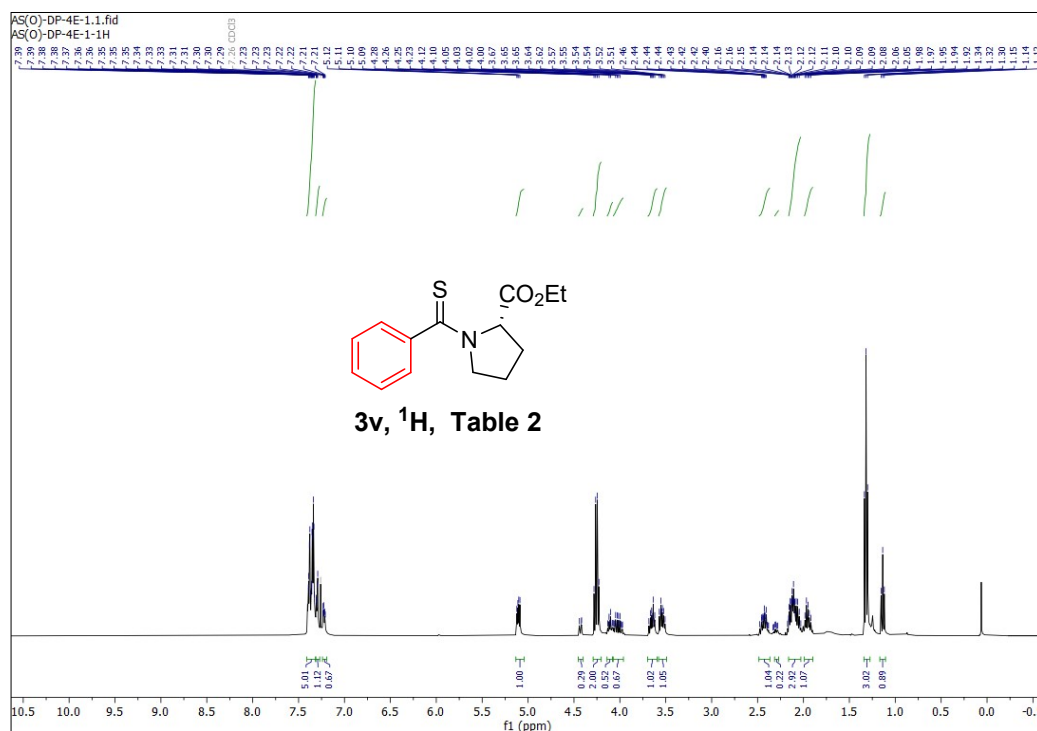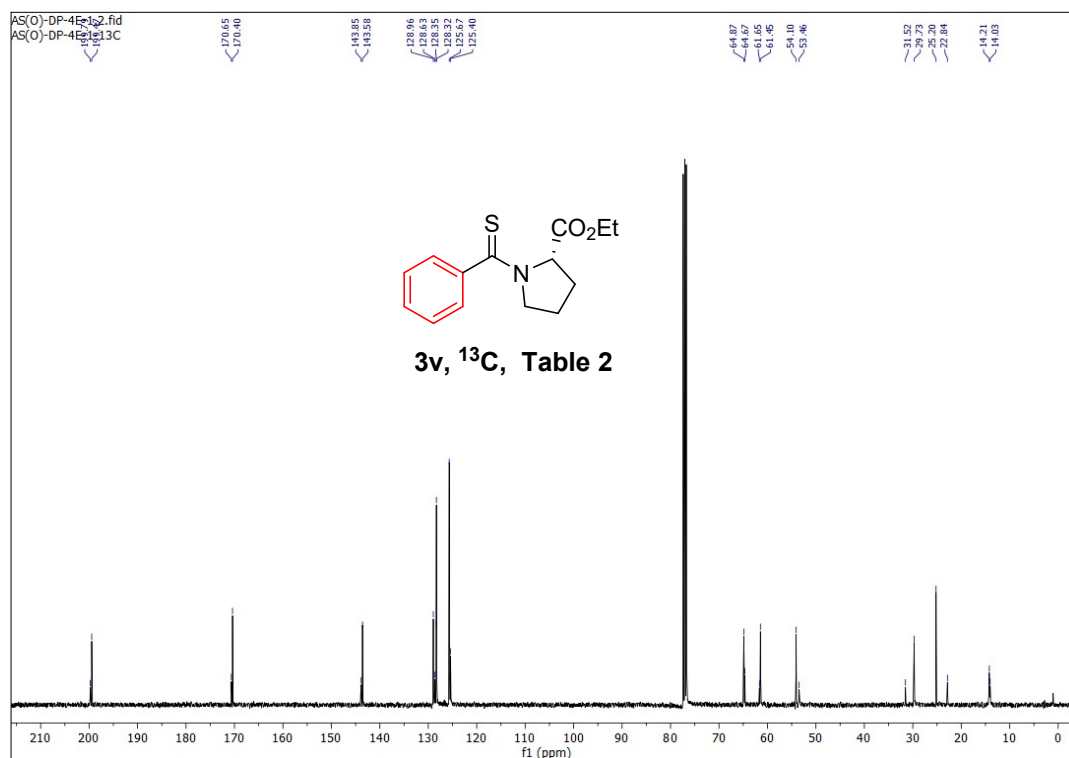

**$^1\text{H}$  NMR (400 MHz,  $\text{CDCl}_3$ ),  $^{13}\text{C}$  NMR (100 MHz,  $\text{CDCl}_3$ ) and  $^{19}\text{F}$  NMR (400 MHz,  $\text{CDCl}_3$ ) spectrum of 3w**

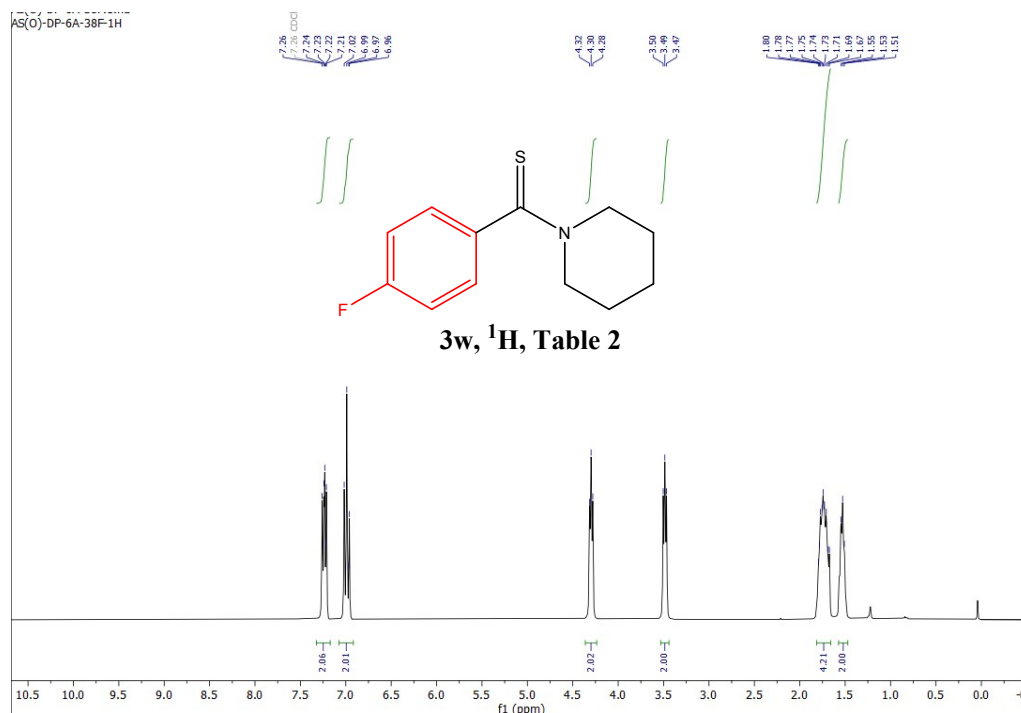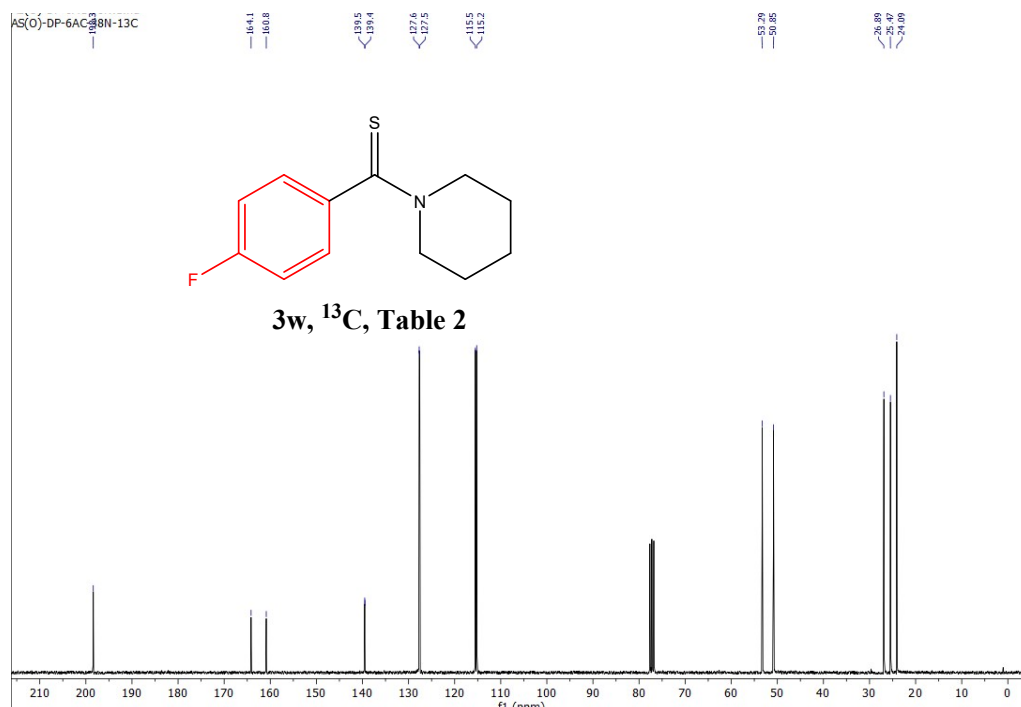



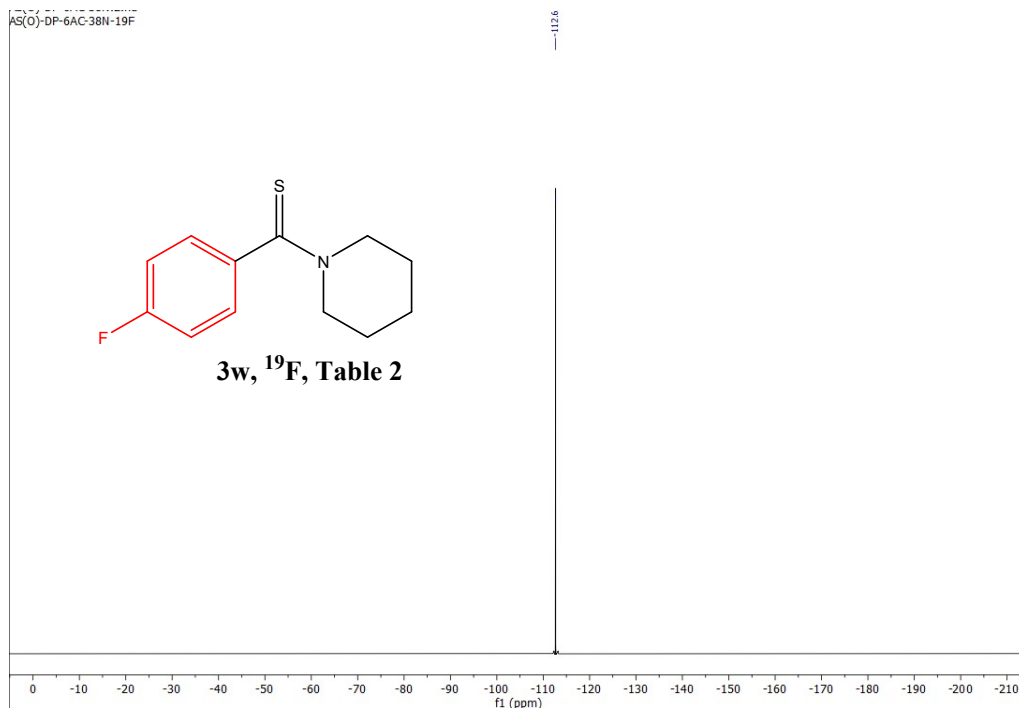

**$^1\text{H}$  NMR (400 MHz,  $\text{CDCl}_3$ ) and  $^{13}\text{C}$  NMR (100 MHz,  $\text{CDCl}_3$ ) spectrum of **3x****

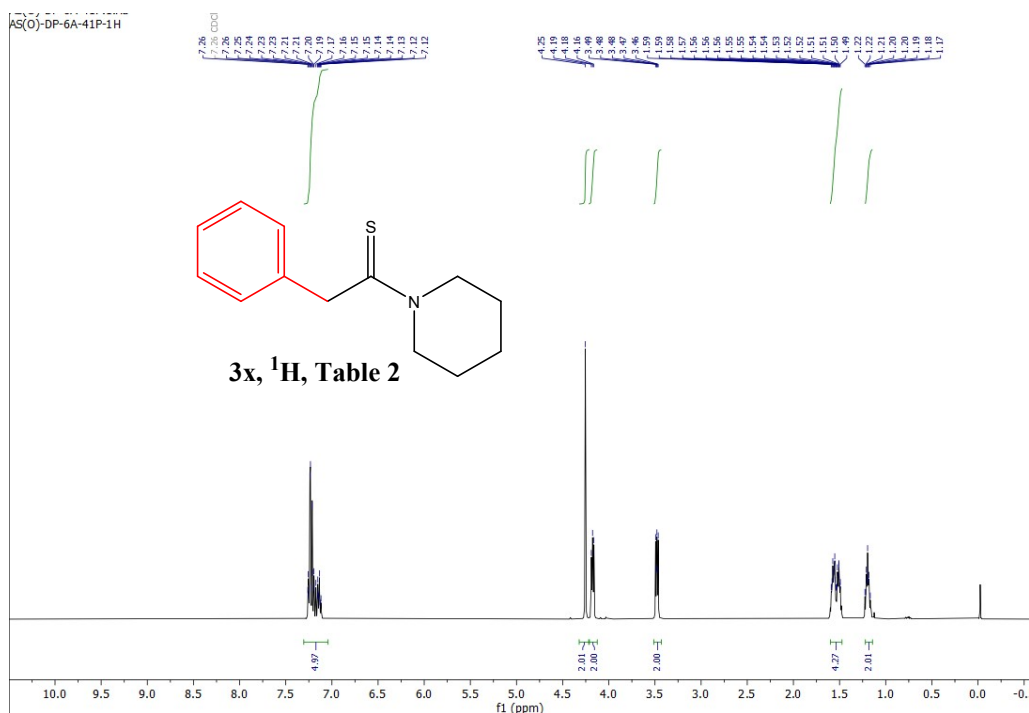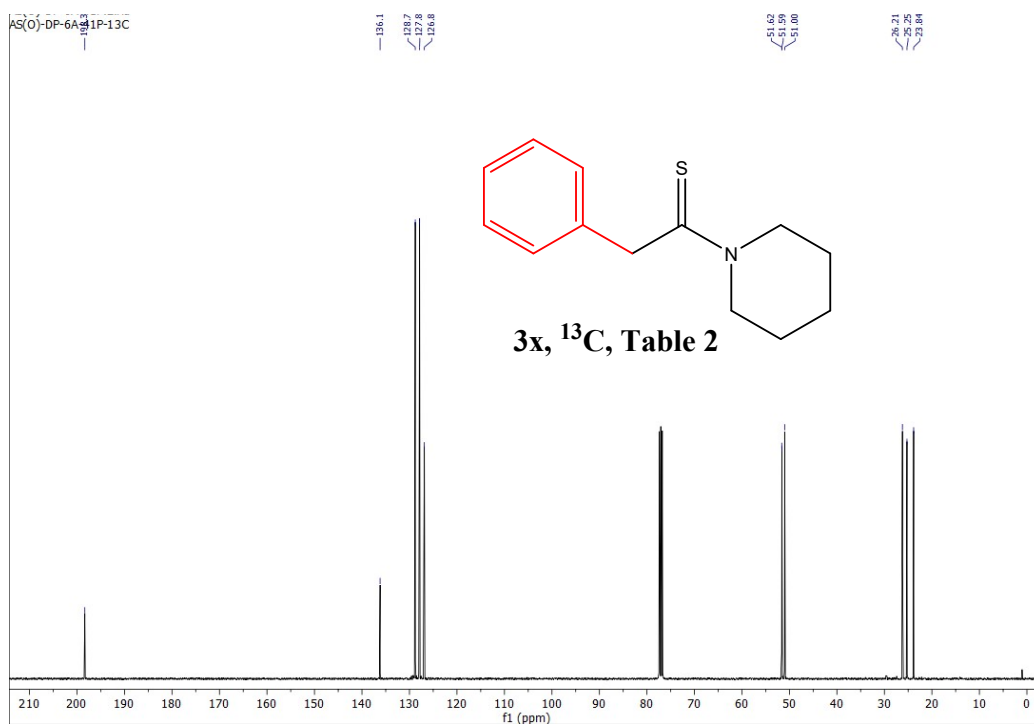

**$^1\text{H}$  NMR (400 MHz,  $\text{CDCl}_3$ ) and  $^{13}\text{C}$  NMR (100 MHz,  $\text{CDCl}_3$ ) spectrum of **3y****

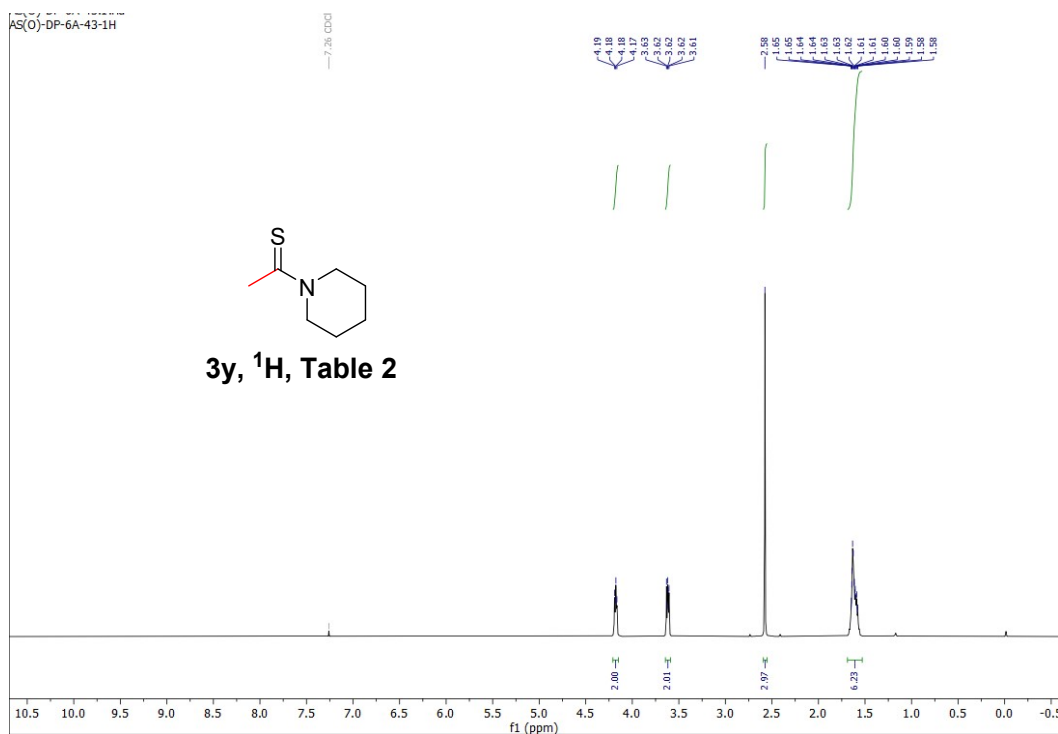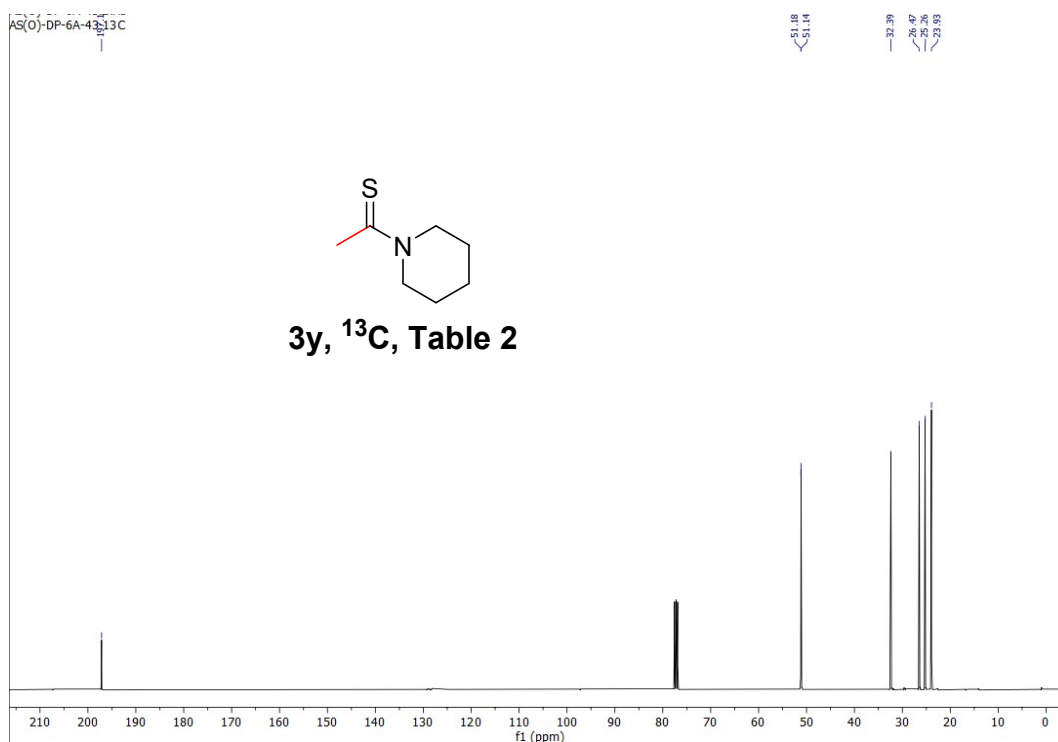

# $^1\text{H}$ NMR (400 MHz, $\text{CDCl}_3$ ) and $^{13}\text{C}$ NMR (100 MHz, $\text{CDCl}_3$ ) spectrum of **3p'**

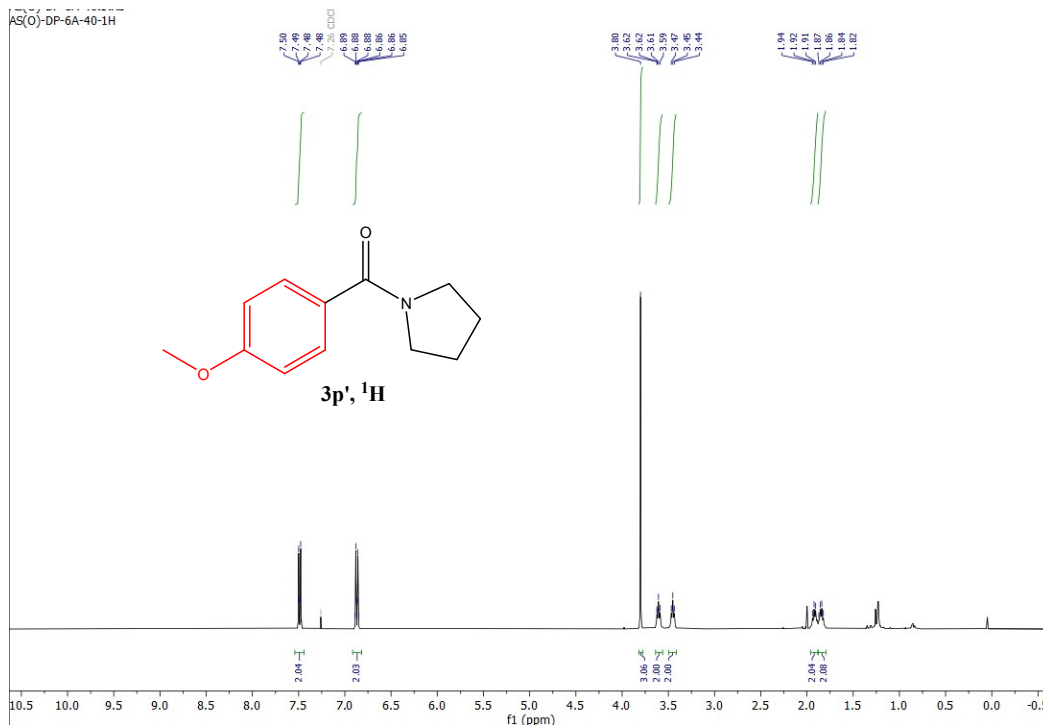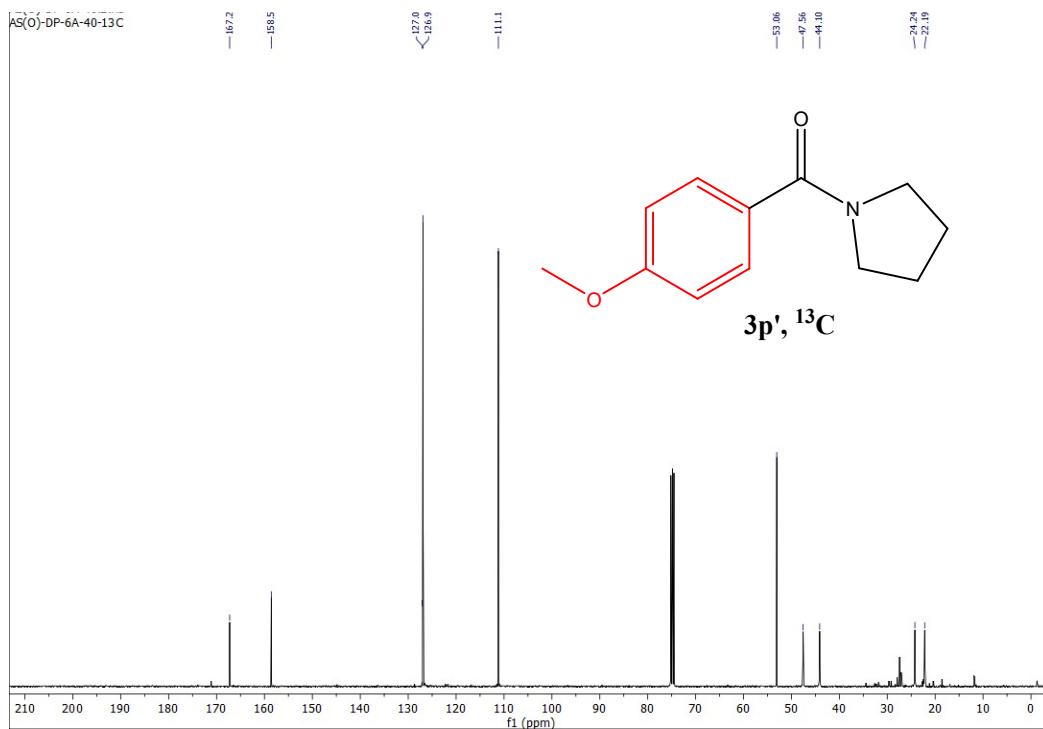

**$^1\text{H}$  NMR (400 MHz,  $\text{CDCl}_3$ ) and  $^{13}\text{C}$  NMR (100 MHz,  $\text{CDCl}_3$ ) spectrum of 4**

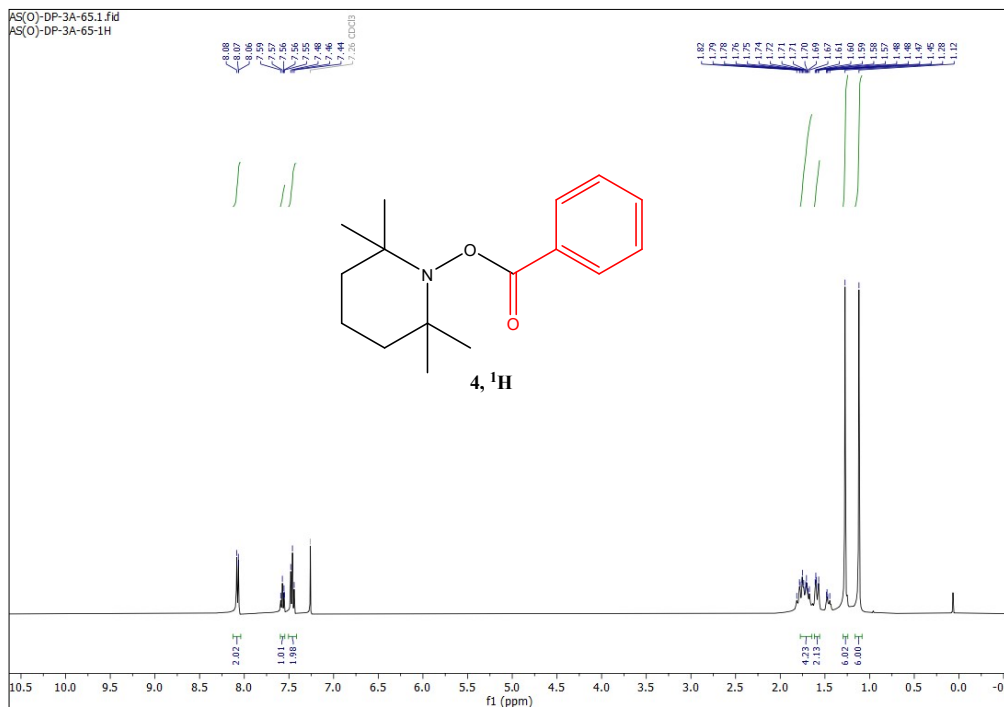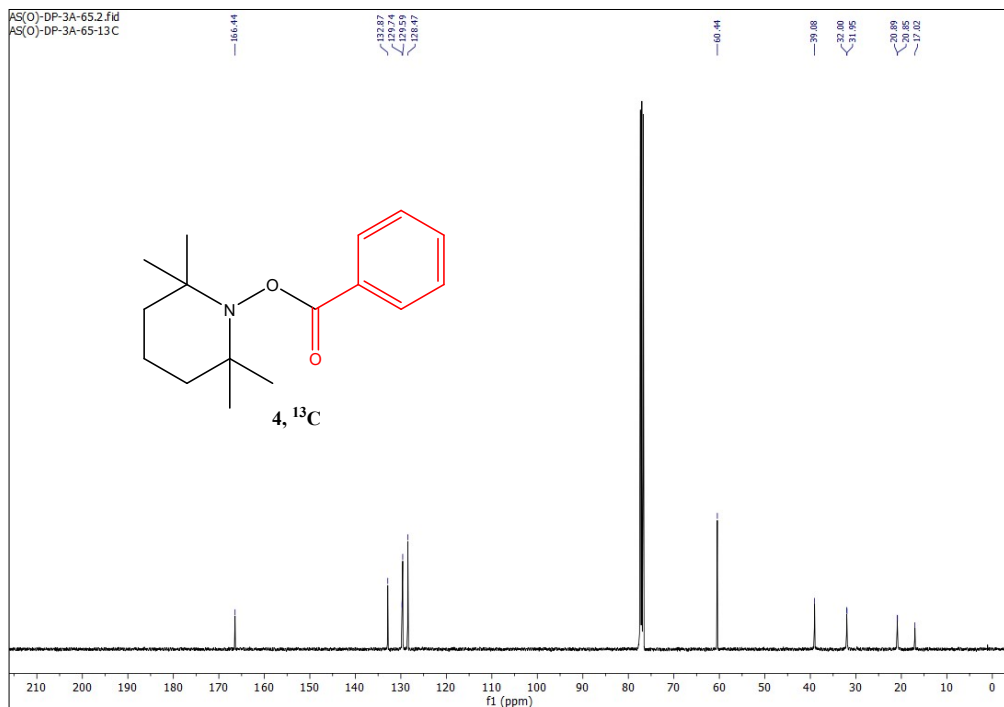

**$^1\text{H}$  NMR (400 MHz,  $\text{CDCl}_3$ ) and  $^{13}\text{C}$  NMR (100 MHz,  $\text{CDCl}_3$ ) spectrum of 5**

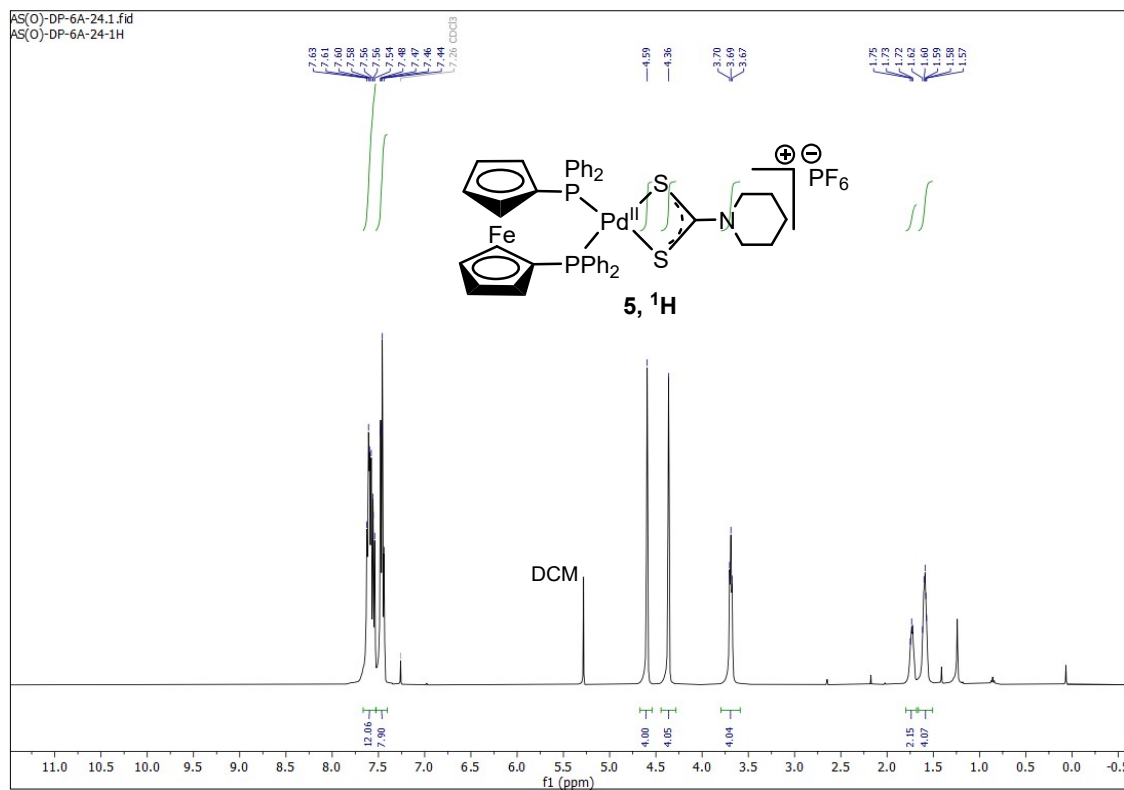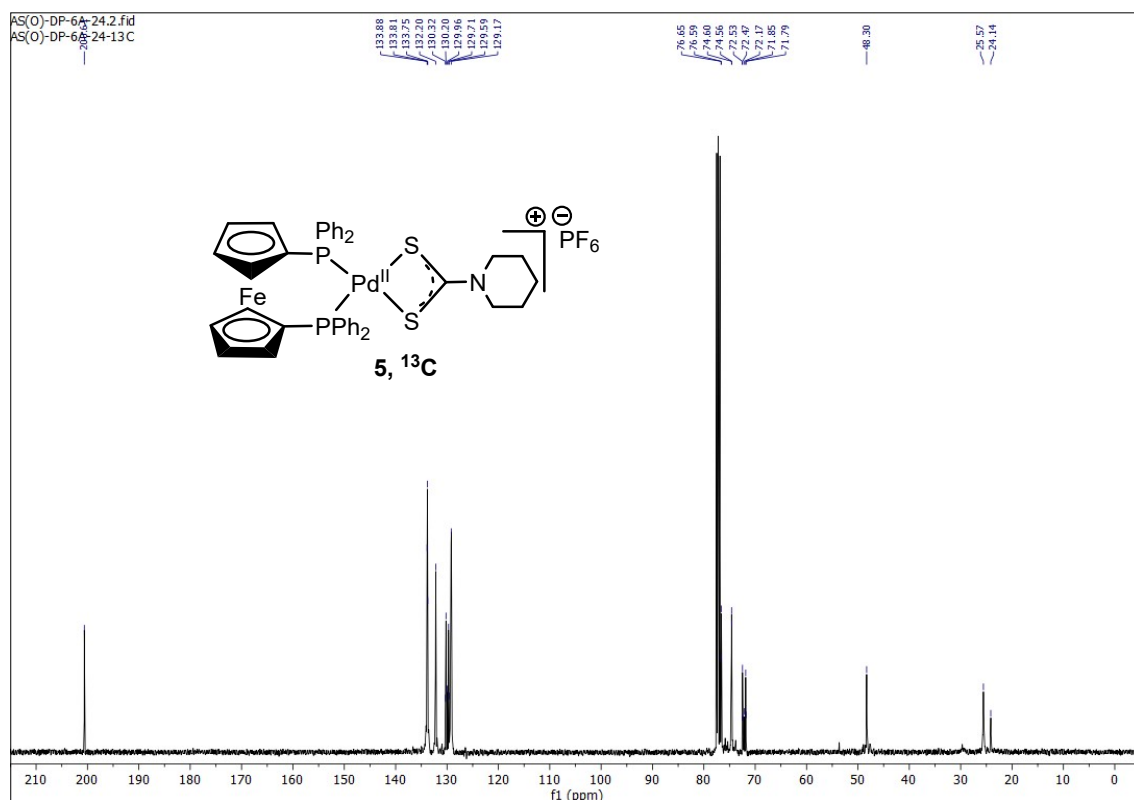

## G. References

1. K. Wadhwa, C.-X. Yang, P. R. West, K. C. Deming, S. R. Chemburkar and R. E. Reddy, Synthesis of arylglyoxylic acids and their collision-induced dissociation, *Synth. Commun.*, 2008, **38**, 4434-4444.
2. Y. Hagimoto, R. Saijo and M. Kawase, Dakin-West reaction of *N*-thioacylprolines using trifluoroacetic anhydride: Novel access to 5-trifluoromethylthiazoles, *Heterocycles*, 2014, **89**, 709-724.
3. Y. A. Tayade, A. D. Jangale and D. S. Dalal, Simple and highly efficient synthesis of thioamide derivatives using  $\beta$ -cyclodextrin as supramolecular catalyst in water, *ChemistrySelect*, 2018, **3**, 8895-8900.
4. H. Jin, X. Ge and S. Zhou, General construction of thioamides under mild conditions: A stepwise proton transfer process mediated by EDTA, *Eur. J. Org. Chem.*, 2021, 6015-6021.
5. L. Peng, L. Maa, Y. Ran, Y. Chen and Z. Zeng, Metal-free three-component synthesis of thioamides from  $\beta$ -nitrostyrenes, amines and elemental sulfur, *Tetrahedron Lett.*, 2021, **74**, 153092.
6. A. D. Kale, Y. A. Tayade, S. D. Mahale, R. D. Patil, and D. S. Dalal, Willgerodt-Kindler reaction at room temperature: Synthesis of thioamides from aromatic aldehydes and cyclic secondary amines, *Tetrahedron*, 2019, **75**, 130575.
7. H.-Z. Li, W.-J. Xue, G.-D. Yin and A.-X. Wu, A multipathway coupled domino strategy: I<sub>2</sub>-mediated oxidative thionation for direct synthesis of thiobenzamides from miscellaneous substrates. *Tetrahedron Lett.*, 2015, **56**, 5843-5846.
8. S. Kumar, R. Vanjari, T. Guntreddi and K. N. Singh, Sulfur promoted decarboxylative thioamidation of carboxylic acids using formamides as amine proxy, *Tetrahedron*, 2016, **72**, 2012-2017.
9. Y. Hagimoto, R. Saijo and M. Kawase, Dakin-West reaction of *N*-thioacylprolines using trifluoroacetic anhydride: Novel access to 5-trifluoromethylthiazoles, *Heterocycles*, 2014, **89**, 709-724.

10. M. Papa, I. Chiarotto and M. Feroci, Willgerodt-Kindler Reaction of Benzaldehydes: A Comparative Study for a Sustainable Synthesis of Secondary Thiobenzamides, *ChemistrySelect*, 2017, **2**, 3207 – 3210.
11. V. J. Lee, W. V. Curran, T. F. Fields and K. Learn, 1,2,3-thiadiazoles. I. Synthesis of sodium (or potassium) 1,2,3-thiadiazole-4-thiolates via thiocarbazonate esters and N-acylthiohydrazonate esters, *Journal of Heterocyclic Chemistry*, 1988, **6**, 1873-91.
12. C. Heyde, I. Zug, and H. Hartmann, A Simple Route to N,N-Dialkyl Derivatives of 2-Amino-5-thiophenecarboxylates, *Eur. J. Org. Chem.* 2000, 3273-23278.
13. D. K. Hesp, G. R. Bergman, and A. J. Ellman, Rhodium-Catalyzed Synthesis of Branched Amines by Direct Addition of Benzamides to Imines, *Organic Letters*, 2012, **9**, 2304-2307.
14. S. Panja, P. Maity and B. C. Ranu, Palladium-catalyzed ligand-free decarboxylative coupling of  $\alpha$ -oxocarboxylic acid with aryl diazonium tetrafluoroborate: An access to unsymmetrical diaryl ketones, *J. Org. Chem.*, 2018, **83**, 20, 12609–12618.
